# Supplementary material
Source: ML conference proceedings conference paper supplement (https://proceedings.neurips.cc/paper_files/paper/2017/hash/c4de8ced6214345614d33fb0b16a8acd-Abstract.html)
Supplement: Supplementary file [file c4de8ced6214345614d33fb0b16a8acd-Supplemental.zip]

## A A Master Theorem

Recall that our goal is to provide sufficient conditions for the SJLT matrix  $\Phi \in \mathbb{R}^{m \times n}$  to preserve the cost of all solutions for tensor regression, i.e., bounds on the sketching dimension  $m$  and the per-column sparsity  $s$  for which

$$\mathbb{E} \sup_{\Phi} \sup_{x \in \mathcal{T}} \left| \|\Phi x\|_2^2 - 1 \right| < \varepsilon/10 \quad (14)$$

where  $\varepsilon$  is a given precision,  $\mathcal{T} = \bigcup_{E \in \mathcal{V}} \{x \in E \mid \|x\|_2 = 1\}$ , and  $\mathcal{V}$  is an infinite union of subspaces defined as

$$\begin{aligned} \mathcal{V} &= \bigcup_{\theta_d^{(r)}, \phi_d^{(r)} \in \mathbb{R}^{p_d}, \forall r \in [R], d \in [D] \setminus \{1\}} \left\{ \text{span} \left[ A^{\{\theta_{\setminus 1}^{(r)}\}}, A^{\{\phi_{\setminus 1}^{(r)}\}} \right] \right\} \text{ for the CP model, and} \\ \mathcal{V} &= \bigcup_{\theta_d^{(r_d)}, \phi_d^{(r_d)} \in \mathbb{R}^{p_d}, \forall r_d \in [R_d], d \in [D] \setminus \{1\}} \left\{ \text{span} \left[ A^{\{\theta_{\setminus 1}^{(r_d)}\}}, A^{\{\phi_{\setminus 1}^{(r_d)}\}} \right] \right\} \text{ for the Tucker model.} \end{aligned}$$

Note that by linearity, it suffices to consider  $x$  with  $\|x\|_2 = 1$  in the above, which explains the form of (14). Also note that by Markov's inequality, (14) implies that for all  $\vartheta = \text{vec}(\Theta)$ , where  $\Theta$  follows the low-rank CP or Tucker decomposition, with probability at least 9/10, we have

$$\|\Phi A \vartheta - \Phi b\|_2^2 = (1 \pm \varepsilon) \|A \vartheta - b\|_2^2. \quad (15)$$

The next theorem follows immediately by plugging in to the bound in Section 8.5 of [2], which our work builds upon. We instantiate the conditions of that theorem for the CP model; the instantiation for the Tucker model follows analogously.

**Theorem 3.** Let  $\mathcal{T} \subset \mathcal{B}_n$  and  $\Phi \in \mathbb{R}^{m \times n}$  be an SJLT matrix with column sparsity  $s$ , and

$$p_{\mathcal{V}} = \sup_{\theta_d^{(r)} \in \mathbb{R}^{p_d}, \forall r \in [R], d \in [D] \setminus \{1\}} \dim \left( \text{span} \left[ A^{\{\theta_{\setminus 1}^{(r)}\}}, A^{\{\phi_{\setminus 1}^{(r)}\}} \right] \right).$$

Then with probability at least 9/10, (15) holds if  $m$  and  $s$  satisfy

$$m \gtrsim \frac{(\gamma_2^2(\mathcal{V}, \rho_{\text{Fin}}) + p_{\mathcal{V}} + \log \mathcal{N}(\mathcal{V}, \rho_{\text{Fin}}, \varepsilon_0)) (\log^4 m) (\log^5 n)}{\varepsilon^2}, \quad (16)$$

$$s \gtrsim \frac{\left( \left[ \int_0^{\varepsilon_0} (\log \mathcal{N}(\mathcal{V}, \rho_{\text{Fin}}, t))^{1/2} dt \right]^2 + \tilde{\alpha}^2 \log^2 \mathcal{N}(\mathcal{V}, \rho_{\text{Fin}}, \varepsilon_0) + \varepsilon_0^2 p_{\mathcal{V}} \log \frac{1}{\varepsilon_0} \right) (\log^6 m) (\log^5 n)}{\varepsilon^2}, \quad (17)$$

where  $\tilde{\alpha}^2$  is the largest leverage score of any  $\left[ A^{\{\theta_{\setminus 1}^{(r)}\}}, A^{\{\phi_{\setminus 1}^{(r)}\}} \right] \in \mathcal{V}$  and  $\mathcal{N}(\mathcal{V}, \rho_{\text{Fin}}, t)$  is the covering number of  $\mathcal{V}$  with radius  $t$  under the Finsler metric.

*Proof.* From the main result in [2], we have that (14) holds if  $m$  and  $s$  satisfy

$$\begin{aligned} m &\gtrsim \varepsilon^{-2} (\log^3 m) (\log^5 n) \gamma_2^2(\mathcal{V}, \rho_{\text{Fin}}) + \varepsilon^{-2} (\log^4 m) (\log^5 n) (p_{\mathcal{V}} + \log \mathcal{N}(\mathcal{V}, \rho_{\text{Fin}}, \varepsilon_0)), \\ s &\gtrsim \varepsilon^{-2} (\log^4 m) (\log^5 n) \left( \tilde{\alpha}^2 \log^2 \mathcal{N}(\mathcal{V}, \rho_{\text{Fin}}, \varepsilon_0) + \varepsilon_0^2 p_{\mathcal{V}} \log \frac{1}{\varepsilon_0} + \left[ \int_0^{\varepsilon_0} (\log \mathcal{N}(\mathcal{V}, \rho_{\text{Fin}}, t))^{1/2} dt \right]^2 \right) \\ &\quad + \varepsilon^{-2} (\log^6 m) (\log^4 n), \end{aligned}$$

which can be obtained from (16) and (17). Thus with probability at least 9/10, (15) holds following the argument above and we finish the proof.  $\square$

## B A Progressive Proof for Main Theorems

Given Theorem 3, the main technical difficulty lies in providing tight bounds on the various terms involved in  $m$  and  $s$  in Theorem 3, which depend on whether we are working in the CP model or the

Tucker model. We start with the most basic case of rank  $R = 1$  for two way tensors (matrices)  $D = 2$  (Theorem 4), then generalize to general ranks  $R \geq 1$  for two way tensors  $D = 2$  (Theorem 5), then to general tensors  $D \geq 1$  with rank  $R = 1$  (Theorem 6), then finally to the generic CP model with  $D \geq 1$  and  $R \geq 1$  (Theorem 1). This helps clarify the analysis and makes the proof of Theorem 1 straightforward. The analysis for the general Tucker model can be addressed in a similar way, and we only provide the proof for the general case to avoid redundancy.

### B.1 Base Case: Rank-1 and Two-Way Tensors

We start with the base case when  $R = 1$  and  $D = 2$ , i.e., the parameter space is  $\mathcal{S}_{2,1}$ . Then the parameter admits the decomposition  $\Theta = \theta_1 \circ \theta_2$ . For notational convenience, we let  $\Theta = u \circ v$ , where  $u \in \mathbb{R}^{p_1}$  and  $v \in \mathbb{R}^{p_2}$ , and let  $A^v = \sum_{i=1}^{p_2} A^{(i)} v_i$ , where  $A = [A^{(1)}, \dots, A^{(p_2)}] \in \mathbb{R}^{n \times p_2 p_1}$  with  $A^{(i)} \in \mathbb{R}^{n \times p_1}$  for all  $i \in [p_2]$ . Consequently, the observation model (4) can be written as

$$b = A(v \otimes u) + z = A^v u + z,$$

and the corresponding OLS and SOLS using an SJLT matrix  $\Phi \in \mathbb{R}^{m \times n}$  are, respectively,

$$\min_{v \in \mathbb{R}^{p_2}, u \in \mathbb{R}^{p_1}} \|A^v u - b\|_2^2 \quad \text{and} \quad \min_{v \in \mathbb{R}^{p_2}, u \in \mathbb{R}^{p_1}} \|\Phi A^v u - \Phi b\|_2^2.$$

Next, we show the following theorem, which provides sufficient conditions for the base case  $\mathcal{S}_{2,1}$ .

**Theorem 4.** Suppose  $\max_{i \in [n]} \ell_i^2(A) \leq 1/p_2^2$ . Let

$$\mathcal{T} = \left\{ \frac{Ax - Ay}{\|Ax - Ay\|_2} \mid x = v_1 \otimes u_1, y = v_2 \otimes u_2, u_1, u_2 \in \mathbb{R}^{p_1} \right\}$$

and  $\Phi \in \mathbb{R}^{m \times n}$  be an SJLT matrix with column sparsity  $s$ . Then with probability at least 9/10, (15) holds if  $m$  and  $s$  satisfy

$$m \gtrsim \varepsilon^{-2} (p_1 + p_2) \log((p_1 + p_2) \kappa_A) (\log^4 m) (\log^5 n), \quad (18)$$

$$s \gtrsim \varepsilon^{-2} \log^2(p_1 + p_2) (\log^6 m) (\log^5 n). \quad (19)$$

The proof of Theorem 4 is provided in Appendix C. From Theorem 4, we have that (15) holds when  $m = \Omega(p_1 + p_2)$  and  $s = \Omega(1)$ .

### B.2 Extension to General Ranks

We next extend our analysis to the case of two-way tensors with general rank, i.e., the parameter space is  $\mathcal{S}_{2,R}$  for  $R \geq 1$ . In this case, we have  $\Theta = \sum_{r=1}^R u^{(r)} \circ v^{(r)}$ , where  $u^{(r)} \in \mathbb{R}^{p_1}$  and  $v^{(r)} \in \mathbb{R}^{p_2}$  for all  $r \in [R]$ , and  $A^{\{v^{(r)}\}} = \left[ \sum_{i=1}^{p_2} A^{(i)} v_i^{(1)}, \dots, \sum_{i=1}^{p_2} A^{(i)} v_i^{(R)} \right]$ , where  $A = [A^{(1)}, \dots, A^{(p_2)}] \in \mathbb{R}^{n \times p_2 p_1}$  and  $A^{(i)} \in \mathbb{R}^{n \times p_1}$  for all  $i \in [p_2]$ . Consequently, the observation model (4) can be written as

$$b = A^{\{v^{(r)}\}} \left[ u^{(1)\top} \dots u^{(R)\top} \right]^\top + z,$$

and the corresponding OLS and SOLS using an SJLT matrix  $\Phi \in \mathbb{R}^{m \times n}$  are, respectively,

$$\min_{v^{(r)} \in \mathbb{R}^{p_2}, u^{(r)} \in \mathbb{R}^{p_1}, \forall r \in [R]} \left\| A^{\{v^{(r)}\}} \left[ u^{(1)\top} \dots u^{(R)\top} \right]^\top - b \right\|_2^2, \quad \text{and} \\ \min_{v^{(r)} \in \mathbb{R}^{p_2}, u^{(r)} \in \mathbb{R}^{p_1}, \forall r \in [R]} \left\| \Phi A^{\{v^{(r)}\}} \left[ u^{(1)\top} \dots u^{(R)\top} \right]^\top - \Phi b \right\|_2^2.$$

Our next theorem provides sufficient conditions for  $\mathcal{S}_{2,R}$ .

**Theorem 5.** Suppose  $R \leq p_2/2$  and  $\max_{i \in [n]} \ell_i^2(A) \leq 1/(R^2 p_2^2)$ . Let

$$\mathcal{T} = \left\{ \frac{Ax - Ay}{\|Ax - Ay\|_2} \mid x = \sum_{r=1}^R v_1^{(r)} \otimes u_1^{(r)}, y = \sum_{r=1}^R v_2^{(r)} \otimes u_2^{(r)}, u_1^{(r)}, u_2^{(r)} \in \mathbb{R}^{p_1}, \forall r \in [R] \right\}$$

and  $\Phi \in \mathbb{R}^{m \times n}$  be an SJLT matrix with column sparsity  $s$ . Then with probability at least 9/10, (15) holds if  $m$  and  $s$  satisfy

$$\begin{aligned} m &\gtrsim \varepsilon^{-2} (\log^4 m) (\log^5 n) R (p_1 + p_2) \log (R(p_1 + p_2) \kappa_A), \\ s &\gtrsim \varepsilon^{-2} (\log^6 m) (\log^5 n) \log^2 (R(p_1 + p_2) \kappa_A). \end{aligned}$$

The proof of Theorem 5 is provided in Appendix D. From Theorem 5, we have that when  $m = \Omega(R(p_1 + p_2))$  and  $s = \Omega(1)$ , (15) holds using an SJLT matrix  $\Phi$ . The extra condition that  $R \leq p_2/2$  is not restrictive, as in applications of low-rank tensors, typically  $R \ll \min_{d \in [D]} p_d$ .

### B.3 Extension to General Tensors

We first extend our analysis to general tensors with rank 1, i.e., the parameter space is now  $\mathcal{S}_{D,1}$  for  $D \geq 2$ . In this case, we have  $\Theta = \theta_1 \circ \dots \circ \theta_D$ , where  $\theta_d \in \mathbb{R}^{p_d}$  for all  $d \in [D]$ . Consequently, the observation model (4) can be written as

$$b = A \cdot (\theta_D \otimes \dots \otimes \theta_1) + z = A^{\{\theta_{\setminus 1}\}} \cdot \theta_1 + z,$$

and the corresponding OLS and SOLS using an SJLT matrix  $\Phi \in \mathbb{R}^{m \times n}$  are, respectively,

$$\min_{\theta_i \in \mathbb{R}^{p_i}, \forall i \in [D]} \left\| A^{\{\theta_{\setminus 1}\}} \theta_1 - b \right\|_2^2 \text{ and } \min_{\theta_i \in \mathbb{R}^{p_i}, \forall i \in [D]} \left\| \Phi A^{\{\theta_{\setminus 1}\}} \theta_1 - \Phi b \right\|_2^2.$$

Our next theorem provides sufficient conditions for  $\mathcal{S}_{D,1}$ .

**Theorem 6.** Suppose  $\max_{i \in [n]} \ell_i^2(A) \leq 1 / \left( \sum_{d=2}^D p_d \right)^2$ . For any  $\vartheta = \theta_D \otimes \dots \otimes \theta_1 \in \mathcal{S}_{\odot D,1}$  and  $\varphi = \phi_D \otimes \dots \otimes \phi_1 \in \mathcal{S}_{\odot D,1}$ ,  $\theta_d, \phi_d \in \mathbb{R}^{p_d}$  for all  $d \in [D]$ . Let

$$\mathcal{T} = \left\{ \frac{A\vartheta - A\varphi}{\|A\vartheta - A\varphi\|_2} \mid \vartheta = \theta_D \otimes \dots \otimes \theta_1, \varphi = \phi_D \otimes \dots \otimes \phi_1, \theta_d, \phi_d \in \mathbb{R}^{p_d}, \forall d \in [D] \right\}$$

and  $\Phi \in \mathbb{R}^{m \times n}$  be an SJLT matrix with column sparsity  $s$ . Then with probability at least 9/10, (15) holds if  $m$  and  $s$  satisfy

$$\begin{aligned} m &\gtrsim \varepsilon^{-2} (\log^4 m) (\log^5 n) \left( \sum_{d=1}^D p_d \log \left( D \kappa_A \sum_{d=1}^D p_d \right) \right), \\ s &\gtrsim \varepsilon^{-2} (\log^6 m) (\log^5 n) \log^2 \left( \sum_{d=1}^D p_d \right). \end{aligned}$$

The proof of Theorem 6 is provided in Appendix E. From Theorem 6, we have that when  $m = \Omega \left( \sum_{d=1}^D p_d \right)$  and  $s = \Omega(1)$ , (15) holds using an SJLT matrix  $\Phi$ .

## C Proof of Theorem 4

We start with an illustration that the set  $\mathcal{T}$  can be reparameterized to the following set with respect to tensors with orthogonal factors:

$$\begin{aligned} \mathcal{T} &= \bigcup_{E \in \mathcal{V}} \{x \in E \mid \|x\|_2 = 1\}, \text{ where } \mathcal{V} = \bigcup_{\widetilde{W}} \{\text{span}[A^{v_1}, A^{v_2}]\} \text{ and} \\ &\quad \widetilde{W} = \{v_1, v_2 \in \mathcal{B}_{p_2}, \langle v_1, v_2 \rangle = 0\}. \end{aligned}$$

Suppose  $\langle v_1, v_2 \rangle \neq 0$ . Let  $v_2 = \alpha v_1 + \beta z$  for some  $\alpha, \beta \in \mathbb{R}$  and a unit vector  $z \in \mathbb{R}^{p_2}$ , where  $\langle v_1, z \rangle = 0$ . Then we have

$$\begin{aligned} \frac{Ax - Ay}{\|Ax - Ay\|_2} &= \frac{A^{v_1}u_1 - A^{v_2}u_2}{\|A^{v_1}u_1 - A^{v_2}u_2\|_2} = \frac{A^{v_1}u_1 - A^{\alpha v_1 + \beta z}u_2}{\|A^{v_1}u_1 - A^{\alpha v_1 + \beta z}u_2\|_2} = \frac{A^{v_1}u_1 - A^{\alpha v_1}u_2 - A^{\beta z}u_2}{\|A^{v_1}u_1 - A^{\alpha v_1}u_2 - A^{\beta z}u_2\|_2} \\ &= \frac{A^{v_1}(u_1 - \alpha u_2) - A^z(\beta u_2)}{\|A^{v_1}(u_1 - \alpha u_2) - A^z(\beta u_2)\|_2}, \end{aligned}$$

which is equivalent to  $\langle v_1, v_2 \rangle = 0$  by reparameterizing  $z$  as  $v_2$ .

Next, by Theorem 3, we need to upper bound  $\rho_{\mathcal{V}}$ ,  $\gamma_2^2(\mathcal{V}, \rho_{\text{Fin}})$ , and  $\mathcal{N}(\mathcal{V}, \rho_{\text{Fin}}, \varepsilon_0)$ . These will be addressed separately as follows.

**Part 1: Bound  $p_{\mathcal{V}}$ .** For notational convenience, we denote  $A^{v_1, v_2} = [A^{v_1}, A^{v_2}]$ . It is straightforward that

$$p_{\mathcal{V}} = \sup_{v_1, v_2 \in \mathcal{B}_{p_2}, \langle v_1, v_2 \rangle = 0} \dim \{\text{span}(A^{v_1, v_2})\} \leq 2p_1. \quad (20)$$

**Part 2: Bound  $\gamma_2^2(\mathcal{V}, \rho_{\text{Fin}})$ .** By the definition of the  $\gamma_2$ -functional in (7) for the Finsler metric, we have

$$\gamma_2(\mathcal{V}, \rho_{\text{Fin}}) = \inf_{\{\bar{\mathcal{V}}_k\}_{k=0}^{\infty}} \sup_{A^{v_1, v_2} \in \mathcal{V}} \sum_{k=0}^{\infty} 2^{k/2} \cdot \rho_{\text{Fin}}(A^{v_1, v_2}, \bar{\mathcal{V}}_k),$$

where  $\bar{\mathcal{V}}_k$  is an  $\varepsilon_k$ -net of  $\mathcal{V}$ , i.e., for any  $A^{v_1, v_2} \in \mathcal{V}$  there exist  $\bar{v}_1, \bar{v}_2 \in \mathcal{B}_{p_2}$  with  $\langle \bar{v}_1, \bar{v}_2 \rangle = 0$ ,  $\|v_1 - \bar{v}_1\|_2 \leq \eta_k$ , and  $\|v_2 - \bar{v}_2\|_2 \leq \eta_k$ , such that  $A^{\bar{v}_1, \bar{v}_2} \in \bar{\mathcal{V}}_k$  and  $\rho_{\text{Fin}}(A^{v_1, v_2}, A^{\bar{v}_1, \bar{v}_2}) \leq \varepsilon_k$ .

From Lemma 6, we have  $\rho_{\text{Fin}}(A^{v_1, v_2}, \bar{\mathcal{V}}_k) \leq 2\kappa_A \eta_k$  for  $\|v_1 - \bar{v}_1\|_2 \leq \eta_k$  and  $\|v_2 - \bar{v}_2\|_2 \leq \eta_k$ . On the other hand, we have that  $\rho_{\text{Fin}}(A^{v_1, v_2}, \bar{\mathcal{V}}_k) \leq 1$  always holds. Therefore, we have

$$\rho_{\text{Fin}}(A^{v_1, v_2}, \bar{\mathcal{V}}_k) \leq \min\{2\kappa_A \eta_k, 1\}.$$

Let  $k'$  be the smallest integer such that  $2\kappa_A \eta_{k'} \leq 1$ . Then we have

$$\gamma_2(\mathcal{V}, \rho_{\text{Fin}}) \leq \sum_{k=0}^{\infty} 2^{k/2} \cdot \rho_{\text{Fin}}(A^{v_1, v_2}, \bar{\mathcal{V}}_k) \leq \sum_{k=0}^{k'} 2^{k/2} + \sum_{k=k'+1}^{\infty} 2^{k/2} \cdot \rho_{\text{Fin}}(A^{v_1, v_2}, \bar{\mathcal{V}}_k). \quad (21)$$

Suppose that  $\eta_0 = 1$ . Then we have  $|\bar{\mathcal{V}}_0| = 1$ . For  $k \geq 1$ , we have  $\eta_k < 1$  and  $|\bar{\mathcal{V}}_k| \leq (3/\eta_k)^{p_2}$  [29]. By the definition of admissible sequences in the  $\gamma_2$ -functional, we require  $|\bar{\mathcal{V}}_k| \leq 2^{2^k}$ . Without loss of generality, suppose that for all  $k \leq k'$ , we have  $|\bar{\mathcal{V}}_k| \leq 2^{2^k} \leq (3/\eta_k)^{p_2}$ . Then we have  $2^{k/2} \leq \sqrt{p_2 \log \frac{3}{\eta_k}}$ , which implies

$$\sum_{k=0}^{k'} 2^{k/2} = \frac{2^{k'/2}}{\sqrt{2}-1} \lesssim \sqrt{p_2 \log \frac{1}{\eta_{k'}}}. \quad (22)$$

For  $k > k'$ , suppose we choose  $\eta_{k+1} = \eta_k^2$ . Then we have

$$\left(\frac{3}{\eta_{k+1}}\right)^{p_2} \leq \left(\frac{3}{\eta_k}\right)^{2p_2} \leq \left(2^{2^k}\right)^2 = 2^{2^{k+1}}, \quad (23)$$

which implies  $|\bar{\mathcal{V}}_{k+1}| \leq 2^{2^{k+1}}$  as long as  $|\bar{\mathcal{V}}_{k+1}| \leq (3/\eta_{k+1})^{p_2}$  holds. In other words, we have  $|\bar{\mathcal{V}}_k| \leq 2^{2^k}$  if we choose  $\eta_{k+1} = \eta_k^2$  for all  $k > k'$ . Suppose  $k'$  is the smallest integer such that when we choose  $\eta_{k'+1} = \frac{1}{4\kappa_A}$ , then  $\left(\frac{3}{\eta_{k'+1}}\right)^{p_2} \leq 2^{2^{k'+1}}$  holds. This implies (23) holds and

$\rho_{\text{Fin}}(A^{v_1, v_2}, \bar{\mathcal{V}}_k) \leq (1/2)^{2^{k-k'}}$  for all  $k > k'$ . Then we have

$$\sum_{k=k'+1}^{\infty} 2^{k/2} \cdot \rho_{\text{Fin}}(A^{v_1, v_2}, \bar{\mathcal{V}}_k) = 2^{k'/2} \cdot \sum_{t=1}^{\infty} 2^{t/2} \cdot \left(\frac{1}{2}\right)^{2^t} \leq 2^{k'/2} \lesssim \sqrt{p_2 \log \frac{1}{\eta_{k'}}}, \quad (24)$$

where the first inequality is from the Cauchy condensation test  $\sum_{t=0}^{\infty} 2^{t/2} \cdot \left(\frac{1}{2}\right)^{2^t} \leq 2 \cdot \sum_{t=0}^{\infty} \left(\frac{1}{2}\right)^t = 1$  and the second inequality is from (22).

Combining (21), (22), and (24), we have

$$\gamma_2^2(\mathcal{V}, \rho_{\text{Fin}}) \lesssim p_2 \log \frac{1}{\eta_{k'}}. \quad (25)$$

From Lemma 6, suppose we choose a small enough  $\varepsilon_0$  such that  $\varepsilon_0 \leq 2\kappa_A \eta_{k'}$ . Then (25) implies

$$\gamma_2^2(\mathcal{V}, \rho_{\text{Fin}}) \lesssim p_2 \log \frac{\kappa_A}{\varepsilon_0}. \quad (26)$$

**Part 3: Bound  $\mathcal{N}(\mathcal{V}, \rho_{\text{Fin}}, \varepsilon_0)$ .** From our choice from Part 2,  $\varepsilon_0 \in (0, 1)$  is a constant. Then it is straightforward that

$$\mathcal{N}(\mathcal{V}, \rho_{\text{Fin}}, \varepsilon_0) \leq \left(\frac{3}{\varepsilon_0}\right)^{2p_2}. \quad (27)$$

This implies

$$\begin{aligned} \int_0^{\varepsilon_0} [\log \mathcal{N}(\mathcal{V}, \rho_{\text{Fin}}, t)]^{1/2} dt &\leq \int_0^{\varepsilon_0} (\log(3/t)^{p_2})^{1/2} dt \stackrel{(i)}{\lesssim} \sqrt{p_2} \int_0^{\varepsilon_0} (-\log t)^{1/2} dt \\ &= \sqrt{p_2} \int_{-\infty}^{(-\log \varepsilon_0)^{1/2}} 2w^2 e^{-w^2} dw = \sqrt{p_2} \left( \left[ w \cdot e^{-w^2} \right]_{-\infty}^{(-\log \varepsilon_0)^{1/2}} - \int_{-\infty}^{(-\log \varepsilon_0)^{1/2}} e^{-w^2} dw \right) \\ &\leq \sqrt{p_2} \left[ w \cdot e^{-w^2} \right]_{-\infty}^{(-\log \varepsilon_0)^{1/2}} = \varepsilon_0 \sqrt{p_2 \log \frac{1}{\varepsilon_0}}. \end{aligned} \quad (28)$$

where (i) is from setting  $w = (-\log t)^{1/2}$ . From Lemma 4, we have

$$\tilde{\alpha}^2 = \max_{i \in [n]} \ell_i^2(A^{v_1, v_2}) \leq \max_{i \in [n]} \ell_i^2(A) \leq 1/p_2^2. \quad (29)$$

Combining (20), (26)–(29), and Theorem 3, we have that the claim holds if

$$\begin{aligned} m &\gtrsim \varepsilon^{-2} \left( p_2 \log \frac{\kappa_A}{\varepsilon_0} + p_1 + p_2 \log \frac{1}{\varepsilon_0} \right) (\log^4 m)(\log^5 n) \text{ and} \\ s &\gtrsim \varepsilon^{-2} \left( \log^2 \frac{1}{\varepsilon_0} + \varepsilon_0^2 (p_1 + p_2) \log \frac{1}{\varepsilon_0} \right) (\log^6 m)(\log^5 n). \end{aligned}$$

Taking  $\varepsilon_0 = 1/(p_1 + p_2)$ , we finish the proof. Note that since  $2\kappa_A \eta_{k'} \geq 1/2$ , we only require  $\rho_{\text{Fin}}(A^{v_1, v_2}, \bar{\mathcal{V}}_{k'}) \leq 1/2$  in Part 2. Thus the choice  $\varepsilon_0 = 1/(p_1 + p_2)$  is valid here.

## D Proof of Theorem 5

Denote  $A^{\{v_i^{(r)}\}} = \left[ A^{\{v_1^{(r)}\}}, A^{\{v_2^{(r)}\}} \right] \in \mathbb{R}^{n \times 2Rp_1}$ . We illustrate that the set  $\mathcal{T}$  can be reparameterized to the following set with respect to tensors with partial orthogonal factors:

$$\begin{aligned} \mathcal{T} &= \bigcup_{E \in \mathcal{V}} \{x \in E \mid \|x\|_2 = 1\}, \text{ where } \mathcal{V} = \bigcup_{\widetilde{\mathcal{W}}} \text{span} \left( A^{\{v_i^{(r)}\}} \right) \text{ and} \\ \widetilde{\mathcal{W}} &= \left\{ \forall i \in [2], r, q \in [R], q \neq r, v_i^{(r)} \in \mathcal{B}_{p_2}, \langle v_1^{(r)}, v_2^{(r)} \rangle = \langle v_i^{(r)}, v_i^{(q)} \rangle = 0 \right\}. \end{aligned}$$

Suppose for all  $r \in [R]$ ,  $v_2^{(r)} = \alpha^{(r)} v_1^{(r)} + \beta^{(r)} z^{(r)}$  for some  $\alpha^{(r)}, \beta^{(r)} \in \mathbb{R}$  and unit vectors  $z^{(r)} \in \mathbb{R}^{p_2}$ , where  $\langle v_1^{(r)}, z^{(r)} \rangle = 0$ . Then we have

$$\begin{aligned} Ax - Ay &= \sum_{r=1}^R \left( A^{v_1^{(r)}} \cdot u_1^{(r)} - A^{v_2^{(r)}} \cdot u_2^{(r)} \right) = \sum_{r=1}^R \left( A^{v_1^{(r)}} \cdot u_1^{(r)} - A^{\alpha^{(r)} v_1^{(r)} + \beta^{(r)} z^{(r)}} \cdot u_2^{(r)} \right) \\ &= \sum_{r=1}^R \left( A^{v_1^{(r)}} \cdot u_1^{(r)} - A^{\alpha^{(r)} v_1^{(r)}} \cdot u_2^{(r)} - A^{\beta^{(r)} z^{(r)}} \cdot u_2^{(r)} \right) \\ &= \sum_{r=1}^R \left( A^{v_1^{(r)}} \cdot \left( u_1^{(r)} - \alpha^{(r)} u_2^{(r)} \right) - A^{z^{(r)}} \cdot \left( \beta^{(r)} u_2^{(r)} \right) \right). \end{aligned}$$

which is equivalent to  $\langle v_1^{(r)}, v_2^{(r)} \rangle = 0$  by reparameterizing  $z^{(r)}$  as  $v_2^{(r)}$ .

Using a similar argument, we show the general scenario. For any  $r \in [R]$ ,  $r \geq 2$ , w.l.o.g., suppose

$$v_1^{(r)} = \alpha_1^{(r,1)} v_1^{(1)} + \sum_{i=2}^r \alpha_1^{(r,i)} z_1^{(i)} \quad \text{and} \quad v_2^{(r)} = \beta_1^{(r,1)} v_1^{(1)} + \sum_{i=2}^r \beta_1^{(r,i)} z_1^{(i)} + \sum_{j=1}^r \beta_2^{(r,j)} z_2^{(j)}.$$

where  $\alpha_1^{(r,i)}, \beta_1^{(r,i)}, \beta_2^{(r,j)} \in \mathbb{R}$  are real coefficients and  $\langle v_1^{(1)}, z_1^{(i)} \rangle = \langle v_1^{(1)}, z_2^{(j)} \rangle = \langle z_1^{(i)}, z_2^{(j)} \rangle = 0$  for any  $i, j \in [r]$ . For  $R = 1$ , the argument is identical to the one above. For  $2 \leq R \leq p_2/2$ , we have

$$\begin{aligned} Ax - Ay &= \sum_{r=1}^R \left( A^{v_1^{(r)}} \cdot u_1^{(r)} - A^{v_2^{(r)}} \cdot u_2^{(r)} \right) \\ &= \sum_{r=2}^R \left( A^{\alpha_1^{(r,1)} v_1^{(1)} + \sum_{i=2}^r \alpha_1^{(r,i)} z_1^{(i)}} \cdot u_1^{(r)} - A^{\beta_1^{(r,1)} v_1^{(1)} + \sum_{i=2}^r \beta_1^{(r,i)} z_1^{(i)} + \sum_{j=1}^r \beta_2^{(r,j)} z_2^{(j)}} \cdot u_2^{(r)} \right) \\ &\quad + A^{v_1^{(1)}} \cdot u_1^{(r)} - A^{\left( \beta_1^{(1,1)} v_1^{(1)} + \beta_2^{(1,1)} z_2^{(1)} \right)} \cdot u_2^{(r)} \\ &= \sum_{r=2}^R \left( A^{v_1^{(1)}} \cdot \left( \alpha_1^{(r,1)} u_1^{(1)} - \beta_1^{(r,1)} u_2^{(1)} \right) + \sum_{i=2}^r A^{z_1^{(i)}} \cdot \left( \alpha_1^{(r,i)} u_1^{(i)} - \beta_1^{(r,i)} u_2^{(i)} \right) \right. \\ &\quad \left. - \sum_{j=1}^r A^{z_2^{(j)}} \cdot \left( \beta_2^{(r,j)} u_2^{(j)} \right) \right) + A^{v_1^{(1)}} \cdot u_1^{(r)} - A^{\left( \beta_1^{(1,1)} v_1^{(1)} + \beta_2^{(1,1)} z_2^{(1)} \right)} \cdot u_2^{(r)}, \end{aligned}$$

which is equivalent to  $\langle v_i^{(r)}, v_i^{(q)} \rangle = 0$  and  $\langle v_1^{(r)}, v_2^{(r)} \rangle = 0$  for all  $i \in [2]$ ,  $r \in [R]$ , and  $q \neq r$  by reparameterizing  $z_1^{(i)}$  as  $v_1^{(i)}$  and  $z_2^{(j)}$  as  $v_2^{(j)}$ .

Next, analogous to Theorem 4, we analyze upper bounds on  $\rho_{\mathcal{V}}$ ,  $\gamma_2^2(\mathcal{V}, \rho_{\text{Fin}})$ , and  $\mathcal{N}(\mathcal{V}, \rho_{\text{Fin}}, \varepsilon_0)$ , and obtain the result from Theorem 3.

**Part 1: Bound  $p_{\mathcal{V}}$ .** It is straightforward that

$$p_{\mathcal{V}} = \sup_{\widetilde{\mathcal{W}}} \dim \left\{ \text{span} \left( A^{\{v_i^{(r)}\}} \right) \right\} \leq 2Rp_1. \quad (30)$$

**Part 2: Bound  $\gamma_2^2(\mathcal{V}, \rho_{\text{Fin}})$ .** The  $\gamma_2$ -functional in this case is

$$\gamma_2^2(\mathcal{V}, \rho_{\text{Fin}}) = \inf_{\{\bar{\mathcal{V}}_k\}_{k=0}^{\infty}} \sup_{A^{\{v_i^{(r)}\}} \in \mathcal{V}} \sum_{k=0}^{\infty} 2^{r/2} \cdot \rho_{\text{Fin}} \left( A^{\{v_i^{(r)}\}}, \bar{\mathcal{V}}_k \right),$$

where  $\bar{\mathcal{V}}_k$  is an  $\varepsilon_k$ -net of  $\mathcal{V}$ .

Following the same argument in Part 2 of the proof for Theorem 4, we have from Lemma 7 that if  $k'$  is the smallest integer such that  $2R\kappa_A \eta_{k'} \leq 1$  and we choose  $\eta_{k'+1} = \frac{1}{4R\kappa_A}$ , then we choose a small

enough  $\varepsilon_0$  such that  $\varepsilon_0 \leq 2R\kappa_A\eta_{k'}$ ,

$$\gamma_2^2(\mathcal{V}, \rho_{\text{Fin}}) \lesssim Rp_2 \log \frac{R\kappa_A}{\varepsilon_0}. \quad (31)$$

**Part 3: Bound  $\mathcal{N}(\mathcal{V}, \rho_{\text{Fin}}, \varepsilon_0)$ .** It is straightforward that  $\mathcal{N}(\mathcal{V}, \rho_{\text{Fin}}, \varepsilon_0) \leq \left(\frac{3}{\varepsilon_0}\right)^{2Rp_2}$ . Following the same argument in Part 3 of the proof for Theorem 4, we have

$$\int_0^{\varepsilon_0} [\log \mathcal{N}(\mathcal{V}, \rho_{\text{Fin}}, t)]^{1/2} dt \lesssim \varepsilon_0 \sqrt{Rp_2 \log \frac{1}{\varepsilon_0}}. \quad (32)$$

From Lemma 5, we have

$$\tilde{\alpha}^2 = \max_{i \in [n]} \ell_i^2 \left( A^{\{v_i^{(r)}\}} \right) \leq \max_{i \in [n]} \ell_i^2(A) \leq 1/(R^2 p_2^2). \quad (33)$$

Combining (30) – (33) and Theorem 3, we have that the claim holds if

$$\begin{aligned} m &\gtrsim \varepsilon^{-2} R \left( p_2 \log \frac{R\kappa_A}{\varepsilon_0} + p_1 + p_2 \log \frac{1}{\varepsilon_0} \right) (\log^4 m)(\log^5 n) \quad \text{and} \\ s &\gtrsim \varepsilon^{-2} \left( \log^2 \frac{1}{\varepsilon_0} + \varepsilon_0^2 R(p_1 + p_2) \log \frac{1}{\varepsilon_0} \right) (\log^6 m)(\log^5 n). \end{aligned}$$

We finish the proof by taking  $\varepsilon_0 = \frac{1}{R(p_1 + p_2)}$ . Note that this choice of  $\varepsilon$  satisfies the requirement in Part 2.

## E Proof of Theorem 6

Denote  $\vartheta_{\setminus 1} = \theta_D \otimes \cdots \otimes \theta_2$ ,  $\varphi_{\setminus 1} = \phi_D \otimes \cdots \otimes \phi_2$  and  $A^{\vartheta_{\setminus 1}, \varphi_{\setminus 1}} = [A^{\{\theta_{\setminus 1}\}}, A^{\{\phi_{\setminus 1}\}}] \in \mathbb{R}^{n \times 2p_1}$ . We illustrate that the set  $\mathcal{T}$  can be reparameterized to the following set with respect to tensors with partial orthogonal factors:

$$\begin{aligned} \mathcal{T} &= \bigcup_{E \in \mathcal{V}} \{x \in E \mid \|x\|_2 = 1\}, \quad \text{where } \mathcal{V} = \bigcup_{\widetilde{\mathcal{W}}} \text{span}(A^{\vartheta_{\setminus 1}, \varphi_{\setminus 1}}) \quad \text{and} \\ \widetilde{\mathcal{W}} &= \{\forall d \in [D] \setminus \{1\}, \theta_d, \phi_d \in \mathcal{B}_{p_d}, \exists i \in [D] \setminus \{1\} \text{ s.t. } \langle \theta_i, \phi_i \rangle = 0\}, \end{aligned}$$

W.l.o.g., suppose  $\phi_D = \alpha\theta_D + \beta z$  for some  $\alpha, \beta \in \mathbb{R}$  and a unit vector  $z \in \mathbb{R}^{p_D}$ , where  $\langle \theta_D, z \rangle = 0$ . Then we have

$$\begin{aligned} A\vartheta - A\varphi &= A^{\{\theta_{\setminus 1}\}}\theta_1 - A^{\{\phi_{\setminus 1}\}}\phi_1 = A(\theta_D \otimes \cdots \otimes \theta_2 \otimes I_{p_1})\theta_1 - A(\phi_D \otimes \cdots \otimes \phi_2 \otimes I_{p_1})\phi_1 \\ &= A(\theta_D \otimes \cdots \otimes \theta_2 \otimes I_{p_1})\theta_1 - A((\alpha\theta_D + \beta z) \otimes \phi_{D-1} \otimes \cdots \otimes \phi_2 \otimes I_{p_1})\phi_1 \\ &= A(\theta_D \otimes \cdots \otimes \theta_2 \otimes I_{p_1})\theta_1 - A(\alpha\theta_D \otimes \cdots \otimes \phi_2 \otimes I_{p_1})\phi_1 - A(\beta z \otimes \cdots \otimes \phi_2 \otimes I_{p_1})\phi_1 \\ &= A^{\theta_D}(\theta_{D-1} \otimes \cdots \otimes \theta_1 - \alpha\phi_{D-1} \otimes \cdots \otimes \phi_1) - A^z(\phi_{D-1} \otimes \cdots \otimes \phi_1), \end{aligned}$$

This is equivalent to  $\langle \theta_D, \phi_D \rangle = 0$  by reparameterizing  $z$  as  $\phi_D$ .

Next, analogous to Theorem 4, we analyze upper bounds on  $\rho_{\mathcal{V}}$ ,  $\gamma_2^2(\mathcal{V}, \rho_{\text{Fin}})$ , and  $\mathcal{N}(\mathcal{V}, \rho_{\text{Fin}}, \varepsilon_0)$ , and obtain the result from Theorem 3.

**Part 1: Bound  $p_{\mathcal{V}}$ .** It is straightforward that

$$p_{\mathcal{V}} = \sup_{\widetilde{\mathcal{W}}} \dim \left\{ \text{span}(A^{\vartheta_{\setminus 1}, \varphi_{\setminus 1}}) \right\} \leq 2p_1. \quad (34)$$

**Part 2: Bound  $\gamma_2^2(\mathcal{V}, \rho_{\text{Fin}})$ .** The  $\gamma_2$ -functional in this case is

$$\gamma_2^2(\mathcal{V}, \rho_{\text{Fin}}) = \inf_{\{\bar{\mathcal{V}}_k\}_{k=0}^{\infty}} \sup_{A^{\vartheta_{\setminus 1}, \varphi_{\setminus 1}} \in \mathcal{V}} \sum_{k=0}^{\infty} 2^{r/2} \cdot \rho_{\text{Fin}}(A^{\vartheta_{\setminus 1}, \varphi_{\setminus 1}}, \bar{\mathcal{V}}_k),$$

where  $\bar{\mathcal{V}}_k$  is an  $\varepsilon_k$ -net of  $\mathcal{V}$ .

Following the same argument in Part 2 of the proof of Theorem 4, we have from Lemma 8 that if  $k'$  is the smallest integer such that  $2\kappa_A ((1 + \eta_{k'})^D - 1) \leq 1$ , then we choose  $\varepsilon_0$  small enough such that

$$\varepsilon_0 \leq 2\kappa_A D\eta_{k'} \leq 2\kappa_A ((1 + \eta_{k'})^D - 1).$$

where the second inequality is from the binomial expansion. Then we have

$$\gamma_2^2(\mathcal{V}, \rho_{\text{Fin}}) \lesssim \sum_{d=2}^D p_d \cdot \log \frac{D\kappa_A}{\varepsilon_0}. \quad (35)$$

**Part 3: Bound  $\mathcal{N}(\mathcal{V}, \rho_{\text{Fin}}, \varepsilon_0)$ .** It is straightforward that  $\mathcal{N}(\mathcal{V}, \rho_{\text{Fin}}, \varepsilon_0) \leq \left(\frac{3}{\varepsilon_0}\right)^{2 \sum_{d=2}^D p_d}$ . Following the same argument in Part 3 of the proof for Theorem 4, we have

$$\int_0^{\varepsilon_0} [\log \mathcal{N}(\mathcal{V}, \rho_{\text{Fin}}, t)]^{1/2} dt \lesssim \varepsilon_0 \sqrt{\sum_{d=2}^D p_d \log \frac{1}{\varepsilon_0}}. \quad (36)$$

From Lemma 5, we have

$$\tilde{\alpha}^2 = \max_{i \in [n]} \ell_i^2(A^{\vartheta_{\setminus 1}, \varphi_{\setminus 1}}) \leq \max_{i \in [n]} \ell_i^2(A) \leq \frac{1}{\left(\sum_{d=2}^D p_d\right)^2}. \quad (37)$$

Combining (34) – (37) and Theorem 3, we have that the claim holds if

$$\begin{aligned} m &\gtrsim \varepsilon^{-2} \left( p_1 + \sum_{d=2}^D p_d \cdot \log \frac{D\kappa_A}{\varepsilon_0} \right) (\log^4 m)(\log^5 n) \text{ and} \\ s &\gtrsim \varepsilon^{-2} \left( \log^2 \frac{1}{\varepsilon_0} + \varepsilon_0^2 \sum_{d=1}^D p_d \log \frac{1}{\varepsilon_0} \right) (\log^6 m)(\log^5 n). \end{aligned}$$

We finish the proof by taking  $\varepsilon_0 = \frac{1}{\sum_{d=1}^D p_d}$ . Note that this choice of  $\varepsilon$  satisfies the requirement in Part 2.

## F Proof of Theorem 1

Denote  $A^{\{\vartheta_{\setminus 1}^{(r)}, \varphi_{\setminus 1}^{(r)}\}} = \left[ A^{\{\theta_{\setminus 1}^{(r)}\}}, A^{\{\phi_{\setminus 1}^{(r)}\}} \right]$ . We illustrate that the set  $\mathcal{T}$  can be reparameterized to the following set with respect to tensors with partial orthogonal factors:

$$\begin{aligned} \mathcal{T} &= \bigcup_{E \in \mathcal{V}} \{x \in E \mid \|x\|_2 = 1\}, \text{ where } \mathcal{V} = \bigcup_{\widetilde{\mathcal{W}}} \text{span} \left( A^{\{\vartheta_{\setminus 1}^{(r)}, \varphi_{\setminus 1}^{(r)}\}} \right), \\ \widetilde{\mathcal{W}} &= \left\{ \forall r \in [R], d \in [D] \setminus \{1\}, \theta_d^{(r)}, \phi_d^{(r)} \in \mathcal{B}_{p_d}; \forall r, q \in [R], \exists i \in [D] \setminus \{1\} \text{ s.t. } \langle \theta_i^{(r)}, \phi_i^{(q)} \rangle = 0; \right. \\ &\quad \left. \forall r \in [R-1], q \in [R] \setminus [r], \exists j, k \in [D] \setminus \{1\} \text{ s.t. } \langle \theta_j^{(r)}, \theta_j^{(q)} \rangle = \langle \phi_k^{(r)}, \phi_k^{(q)} \rangle = 0 \right\}. \end{aligned}$$

For  $R = 1$ , the argument is identical to the analysis in Theorem 6. For any  $r \in [R]$ ,  $r \geq 2$ , w.l.o.g., suppose

$$\theta_D^{(r)} = \alpha_1^{(r,1)} \theta_D^{(1)} + \sum_{i=2}^r \alpha_1^{(r,i)} z_1^{(i)} \text{ and } \phi_D^{(r)} = \beta_1^{(r,1)} \theta_D^{(1)} + \sum_{i=2}^r \beta_1^{(r,i)} z_1^{(i)} + \sum_{j=1}^r \beta_2^{(r,j)} z_2^{(j)},$$



where  $\alpha_1^{(r,i)}, \beta_1^{(r,i)}, \beta_2^{(r,j)} \in \mathbb{R}$  are real coefficients and  $\langle \theta_D^{(1)}, z_1^{(i)} \rangle = \langle \theta_D^{(1)}, z_2^{(i)} \rangle = \langle z_1^{(i)}, z_2^{(j)} \rangle = 0$  for any  $i, j \in [r]$ . Then for  $2 \leq R \leq p_2/2$ , we have

$$\begin{aligned}
A\vartheta - A\varphi &= A \cdot \sum_{r=1}^R \left( \theta_D^{(r)} \otimes \cdots \otimes \theta_2^{(r)} \otimes I_{p_1} \right) \theta_1^{(r)} - A \cdot \sum_{r=1}^R \left( \phi_D^{(r)} \otimes \cdots \otimes \phi_2^{(r)} \otimes I_{p_1} \right) \phi_1^{(r)} \\
&= A \cdot \sum_{r=2}^R \left( \left( \alpha_1^{(r,1)} \theta_D^{(1)} + \sum_{i=2}^r \alpha_1^{(r,i)} z_1^{(i)} \right) \otimes \cdots \otimes \theta_1^{(r)} \right) + A \cdot \left( \theta_D^{(1)} \otimes \cdots \otimes \theta_1^{(1)} \right) \\
&\quad - A \cdot \sum_{r=2}^R \left( \left( \beta_1^{(r,1)} \theta_D^{(1)} + \sum_{i=2}^r \beta_1^{(r,i)} z_1^{(i)} + \sum_{j=1}^r \beta_2^{(r,j)} z_2^{(j)} \right) \otimes \cdots \otimes \phi_1^{(r)} \right) \\
&\quad - A \cdot \left( \left( \beta_1^{(1,1)} \theta_D^{(1)} + \beta_2^{(1,1)} z_2^{(1)} \right) \otimes \cdots \otimes \phi_1^{(1)} \right) \\
&= \sum_{r=r}^R A \theta_D^{(1)} \left( \alpha_1^{(r,1)} \theta_{D-1}^{(r)} \otimes \cdots \otimes \theta_1^{(r)} - \beta_1^{(r,1)} \phi_{D-1}^{(r)} \otimes \cdots \otimes \phi_1^{(r)} \right) \\
&\quad + \sum_{r=2}^R \sum_{i=2}^r A z_1^{(1)} \left( \alpha_1^{(r,i)} \theta_{D-1}^{(r)} \otimes \cdots \otimes \theta_1^{(r)} - \beta_1^{(r,i)} \phi_{D-1}^{(r)} \otimes \cdots \otimes \phi_1^{(r)} \right) \\
&\quad - \sum_{r=1}^R \sum_{j=1}^r A z_2^{(j)} \left( \beta_2^{(r,j)} \phi_{D-1}^{(r)} \otimes \cdots \otimes \phi_1^{(r)} \right)
\end{aligned}$$

where  $\alpha_1^{(1,1)} = 1$ . This is equivalent to  $\langle \theta_D^{(r)}, \phi_D^{(r)} \rangle = 0$ ,  $\langle \theta_D^{(r)}, \theta_D^{(q)} \rangle = 0$ , and  $\langle \phi_D^{(r)}, \phi_D^{(q)} \rangle = 0$  for all  $r \in [R]$  and  $q \neq [R] \setminus [r]$ , by reparameterizing  $z_1^{(i)}$  and  $z_2^{(j)}$  as  $\theta_D^{(i)}$  and  $\phi_D^{(j)}$  properly. The remaining pairs of orthogonality in  $\mathcal{W}$  can be checked analogously by repeating the argument above.

**Part 1: Bound  $p_{\mathcal{V}}$ .** It is straightforward that

$$p_{\mathcal{V}} = \sup_{\tilde{\mathcal{W}}} \dim \left\{ \text{span} \left( A \left\{ \vartheta_{\setminus 1}^{(r)}, \varphi_{\setminus 1}^{(r)} \right\} \right) \right\} \leq 2Rp_1. \quad (38)$$

**Part 2: Bound  $\gamma_2^2(\mathcal{V}, \rho_{\text{Fin}})$ .** The  $\gamma_2$ -functional in this case is

$$\gamma_2^2(\mathcal{V}, \rho_{\text{Fin}}) = \inf_{\{\bar{\mathcal{V}}_k\}_{k=0}^{\infty}} \sup_{A \left\{ \vartheta_{\setminus 1}^{(r)}, \varphi_{\setminus 1}^{(r)} \right\} \in \mathcal{V}} \sum_{k=0}^{\infty} 2^{r/2} \cdot \rho_{\text{Fin}} \left( A \left\{ \vartheta_{\setminus 1}^{(r)}, \varphi_{\setminus 1}^{(r)} \right\}, \bar{\mathcal{V}}_k \right),$$

where  $\bar{\mathcal{V}}_k$  is an  $\varepsilon_k$ -net of  $\mathcal{V}$ .

Following the same argument in Part 2 of the proof for Theorem 4, we have from Lemma 9 that if  $k'$  is the smallest integer such that  $2R\kappa_A ((1 + \eta_{k'})^D - 1) \leq 1$ , then we choose  $\varepsilon_0$  small enough such that

$$\varepsilon_0 \leq 2RD\kappa_A \eta_{k'} \leq 2R\kappa_A ((1 + \eta_{k'})^D - 1),$$

where the second inequality follows from the binomial expansion. Then we have

$$\gamma_2^2(\mathcal{V}, \rho_{\text{Fin}}) \lesssim \sum_{d=2}^D p_d \cdot \log \frac{RD\kappa_A}{\varepsilon_0}. \quad (39)$$

**Part 3: Bound  $\mathcal{N}(\mathcal{V}, \rho_{\text{Fin}}, \varepsilon_0)$ .** It is straightforward that

$$\mathcal{N}(\mathcal{V}, \rho_{\text{Fin}}, \varepsilon_0) \leq \left( \frac{3}{\varepsilon_0} \right)^{2R \sum_{d=2}^D p_d}.$$

Following the same argument in Part 3 of the proof for Theorem 4, we have

$$\int_0^{\varepsilon_0} [\log \mathcal{N}(\mathcal{V}, \rho_{\text{Fin}}, t)]^{1/2} dt \lesssim \varepsilon_0 \sqrt{R \sum_{d=2}^D p_d \log \frac{1}{\varepsilon_0}}. \quad (40)$$

From Lemma 5, we have

$$\tilde{\alpha}^2 = \max_{i \in [n]} \ell_i^2(A^{\vartheta_{\setminus 1}, \varphi_{\setminus 1}}) \leq \max_{i \in [n]} \ell_i^2(A) \leq \frac{1}{\left(R \sum_{d=2}^D p_d\right)^2}. \quad (41)$$

Combining (38) – (41) and Theorem 3, we have that the claim holds if

$$\begin{aligned} m &\gtrsim \varepsilon^{-2} R \left( p_1 + \sum_{d=2}^D p_d \cdot \log \frac{RD\kappa_A}{\varepsilon_0} \right) (\log^4 m)(\log^5 n), \\ s &\gtrsim \varepsilon^{-2} \left( \log^2 \frac{1}{\varepsilon_0} + \varepsilon_0^2 R \sum_{d=1}^D p_d \log \frac{1}{\varepsilon_0} \right) (\log^6 m)(\log^5 n). \end{aligned}$$

We finish the proof by taking  $\varepsilon_0 = \frac{1}{R \sum_{d=1}^D p_d}$ . Note that this choice of  $\varepsilon$  satisfies the requirement in Part 2.

## G Proof of Theorem 2

Denote  $A^{\{\vartheta_{\setminus 1}^{r_d}\}, \{\varphi_{\setminus 1}^{r_d}\}} = \left[ A^{\{\theta_{\setminus 1}^{r_d}\}}, A^{\{\phi_{\setminus 1}^{r_d}\}} \right]$ . We illustrate that the set  $\mathcal{T}$  can be reparameterized to the following set with respect to tensors with partial orthogonal factors:

$$\begin{aligned} \mathcal{T} &= \bigcup_{E \in \mathcal{V}} \{x \in E \mid \|x\|_2 = 1\}, \text{ where } \mathcal{V} = \bigcup_{\widetilde{\mathcal{W}}} \text{span} \left( A^{\{\vartheta_{\setminus 1}^{r_d}\}, \{\varphi_{\setminus 1}^{r_d}\}} \right) \text{ and} \\ \widetilde{\mathcal{W}} &= \left\{ \forall r_d \in [R_d], d \in [D] \setminus \{1\}, \theta_d^{(r_d)}, \phi_d^{(r_d)} \in \mathcal{B}_{p_d}; \forall r_d, q_d \in [R_d], \exists d \in [D] \setminus \{1\} \text{ s.t. } \langle \theta_d^{(r_d)}, \phi_d^{(q_d)} \rangle = 0; \right. \\ &\quad \left. \forall r_d \in [R_d - 1], q_d \in [R_d] \setminus [r_d], \exists d, t \in [D] \setminus \{1\} \text{ s.t. } \langle \theta_d^{(r_d)}, \theta_d^{(q_d)} \rangle = \langle \phi_t^{(r_d)}, \phi_t^{(q_d)} \rangle = 0 \right\}. \end{aligned}$$

Repeating the argument in the proof of Theorem 1, we have the equivalence of  $\mathcal{T}$  and the set above.

**Part 1: Bound  $p_{\mathcal{V}}$ .** It is straightforward that

$$p_{\mathcal{V}} = \sup_{\widetilde{\mathcal{W}}} \dim \left\{ \text{span} \left( A^{\{\vartheta_{\setminus 1}^{r_d}\}, \{\varphi_{\setminus 1}^{r_d}\}} \right) \right\} \leq 2R_1 p_1. \quad (42)$$

**Part 2: Bound  $\gamma_2^2(\mathcal{V}, \rho_{\text{Fin}})$ .** The  $\gamma_2$ -functional in this case is

$$\gamma_2^2(\mathcal{V}, \rho_{\text{Fin}}) = \inf_{\{\overline{\mathcal{V}}_k\}_{k=0}^{\infty}} \sup_{A^{\{\vartheta_{\setminus 1}^{r_d}\}, \{\varphi_{\setminus 1}^{r_d}\}} \in \mathcal{V}} \sum_{k=0}^{\infty} 2^{r/2} \cdot \rho_{\text{Fin}} \left( A^{\{\vartheta_{\setminus 1}^{r_d}\}, \{\varphi_{\setminus 1}^{r_d}\}}, \overline{\mathcal{V}}_k \right),$$

where  $\overline{\mathcal{V}}_k$  is an  $\varepsilon_k$ -net of  $\mathcal{V}$ .

Following the same argument as in Part 2 of the proof for Theorem 4, we have from Lemma 10 that if  $k'$  is the smallest integer such that  $2\kappa_A ((1 + \eta_{k'})^D - 1) \sqrt{\prod_{d=2}^D R_d} \leq 1$ , then we choose  $\varepsilon_0$  small enough such that

$$\varepsilon \leq 2D\kappa_A \eta_{k'} \sqrt{\prod_{d=2}^D R_d} \leq 2C\kappa_A ((1 + \eta_{k'})^D - 1) R_1 \sqrt{\text{nnz}(G)},$$

where the second inequality follows from the binomial theorem. Then we have

$$\gamma_2^2(\mathcal{V}, \rho_{\text{Fin}}) \lesssim \left( \sum_{d=2}^D R_d p_d + \text{nnz}(G) \right) \cdot \log \frac{D \kappa_A \sqrt{\prod_{d=2}^D R_d}}{\varepsilon_0}. \quad (43)$$

**Part 3: Bound  $\mathcal{N}(\mathcal{V}, \rho_{\text{Fin}}, \varepsilon_0)$ .** It is straightforward that

$$\mathcal{N}(\mathcal{V}, \rho_{\text{Fin}}, \varepsilon_0) \leq \left( \frac{3}{\varepsilon_0} \right)^{2(\sum_{d=2}^D R_d p_d + \text{nnz}(G))}.$$

Following the same argument in Part 3 of the proof for Theorem 4, we have

$$\int_0^{\varepsilon_0} [\log \mathcal{N}(\mathcal{V}, \rho_{\text{Fin}}, t)]^{1/2} dt \lesssim \varepsilon_0 \sqrt{\left( \sum_{d=2}^D R_d p_d + \text{nnz}(G) \right) \log \frac{1}{\varepsilon_0}}. \quad (44)$$

From Lemma 5, we have

$$\tilde{\alpha}^2 = \max_{i \in [n]} \ell_i^2(A^{\vartheta_{\setminus 1}, \varphi_{\setminus 1}}) \leq \max_{i \in [n]} \ell_i^2(A) \leq 1 / \left( \sum_{d=2}^D R_d p_d + \text{nnz}(G) \right)^2. \quad (45)$$

Combining (38) – (41) and Theorem 3, we have that the claim holds if

$$\begin{aligned} m &\gtrsim \varepsilon^{-2} \left( R_1 p_1 + \left( \sum_{d=2}^D R_d p_d + \text{nnz}(G) \right) \cdot \log \frac{D \kappa_A R_1 \sqrt{\text{nnz}(G)}}{\varepsilon_0} \right) (\log^4 m) (\log^5 n), \\ s &\gtrsim \varepsilon^{-2} \left( \log^2 \frac{1}{\varepsilon_0} + \varepsilon_0^2 \left( \sum_{d=1}^D R_d p_d + \text{nnz}(G) \right) \log \frac{1}{\varepsilon_0} \right) (\log^6 m) (\log^5 n). \end{aligned}$$

We finish the proof by taking  $\varepsilon_0 = \frac{1}{\sum_{d=1}^D R_d p_d + \text{nnz}(G)}$ . Note that this choice of  $\varepsilon$  satisfies the requirement in Part 2.

## H Flattening Leverage Scores

Our analysis makes the weak assumption that the leverage scores of the design  $A$  are slightly upper bounded. This might be restrictive if we have no control on the design  $A$  at all. In the sequel, we apply a standard idea [9, 26] to flatten the leverage scores of a deterministic design  $A$  based on the subsampled randomized hadamard transformation (SRHT) using the Walsh-Hadamard matrix. An SRHT matrix is defined as  $\Psi = \sqrt{\frac{n}{m}} \Phi H \Sigma$ , where the components  $\Sigma$ ,  $H$ , and  $\Phi$  are generated as:

- (G1)  $\Sigma$  is an  $n \times n$  diagonal matrix, where  $\Sigma_{ii} = 1$  or  $-1$  with equal probabilities  $1/2$ .
- (G2)  $H$  is an  $n \times n$  orthogonal matrix generated from a Walsh-Hadamard matrix scaled by  $n^{-1/2}$ .
- (G3)  $\Phi$  is an  $m \times n$  SJLT matrix, with column sparsity bounded by  $s$ .

Note that computing a matrix-vector product with  $H$  takes  $\mathcal{O}(n \log n)$  instead of  $n^2$  time. Thus, one can compute  $H \Sigma A$  for an  $n \times d$  matrix  $A$  in  $\mathcal{O}(nd \log n)$  time, which is well-suited for the case in which  $A$  is dense, e.g.,  $\text{nnz}(A) = \Theta(nd)$ . The purpose of the matrix product  $H \Sigma$  is to uniformize the leverage scores before applying our SJLT with  $\Phi$ .

We next give a standard lemma for flattening the leverage scores, included for completeness. Without loss of generality, we assume that  $n = 2^q$  for a positive integer  $q$ , implying that a Walsh-Hadamard matrix exists.

**Lemma 1.** Suppose  $H$  and  $\Sigma$  are generated as in (G1) and (G2). Given any real value  $\delta \in (0, 1)$  and an  $n \times d$  matrix  $A$  with  $\text{rank}(A) = r$ , with probability at least  $1 - \delta$ , we have

$$\max_{i \in [n]} \ell_i^2(H \Sigma A) \lesssim \frac{r \cdot \log \left( \frac{nr}{\delta} \right)}{n}.$$

*Proof.* Given a unit vector  $y \in \mathbb{R}^n$ , let  $Z_{jk} = H_{jk} \Sigma_{kk} y_k$  for all  $j \in [n]$ . Then from the independence of  $H_{jk}$  and  $\Sigma_{kk}$ , we have

$$\begin{aligned}\mathbb{E}(Z_{jk}) &= \mathbb{E}(H_{jk} \Sigma_{kk} y_k) = \mathbb{E}(H_{jk}) \cdot \mathbb{E}(\Sigma_{kk}) \cdot y_k = 0, \\ \text{Var}(Z_{jk}) &\leq \mathbb{E}(H_{jk}^2 \Sigma_{kk}^2 y_k^2) = \mathbb{E}(H_{jk}^2) \cdot \mathbb{E}(\Sigma_{kk}^2) \cdot y_k^2 = \frac{y_k^2}{n}.\end{aligned}$$

From the Azuma-Hoeffding inequality, for any  $t > 0$  we have

$$\mathbb{P}\left(\left|\sum_{k=1}^n Z_{jk}\right| > t\right) \leq 2 \exp\left(-\frac{nt^2}{2 \sum_{k=1}^n y_k^2}\right) = 2 \exp\left(-\frac{nt^2}{2}\right).$$

By taking  $t = \sqrt{\frac{2 \log(\frac{2nr}{\delta})}{n}}$ , we have

$$\mathbb{P}\left(\left|\sum_{k=1}^n Z_{jk}\right| > \sqrt{\frac{2 \log(\frac{2nr}{\delta})}{n}}\right) \leq 2 \exp\left(\log\left(\frac{\delta}{2nr}\right)\right) = \frac{\delta}{nr}.$$

By a union bound, we have

$$\mathbb{P}\left(\|H \Sigma y\|_\infty > \sqrt{\frac{2 \log(\frac{2nr}{\delta})}{n}}\right) = \mathbb{P}\left(\max_{j \in [n]} \left|\sum_{k=1}^n Z_{jk}\right| > \sqrt{\frac{2 \log(\frac{2nr}{\delta})}{n}}\right) \leq \frac{\delta}{r}.$$

Suppose  $A = UQ$ , where  $U \in \mathbb{R}^{n \times r}$  has orthonormal columns. Then we have for all  $i \in [n]$  and  $k \in [r]$ ,

$$\ell_i^2(H \Sigma A) = \ell_i^2(H \Sigma U) \leq r \cdot (e_i^\top H \Sigma U e_k)^2.$$

Using a union bound again, we finish the proof by

$$\mathbb{P}\left(\max_{i \in [n]} \ell_i^2(H \Sigma A) > \frac{2r \log(\frac{2nr}{\delta})}{n}\right) \leq \mathbb{P}\left(\max_{i \in [n]} r \cdot \|e_i^\top H \Sigma U e_k\|_\infty^2 > \frac{2r \log(\frac{2nr}{\delta})}{n}\right) \leq \delta.$$

□

Applying this with the bound  $\max_{i \in [n]} \ell_i^2(H \Sigma A) \leq 1/(R \cdot \sum_{d=2}^D p_d)^2$  of Theorem 1 gives:

**Proposition 1.** Suppose  $H$  and  $\Sigma$  are generated as in (G1) and (G2). Denote  $C_2 = R \sum_{d=2}^D p_d$ . For low-rank tensor regression (4), where  $A \in \mathbb{R}^{n \times \prod p_d}$  is the matricization of all tensor designs, if  $n$  satisfies  $n \gtrsim C_2^2 \cdot \text{rank}(A) \cdot \log(n \cdot \text{rank}(A)/\delta)$ , then with probability at least  $1 - \delta$ , we have  $\max_{i \in [n]} \ell_i^2(H \Sigma A) \leq 1/C_2^2$ .

Combining Theorem 1 and Proposition 1, we achieve (8), provided  $n$  is sufficiently large. Here we use that for all  $x$ ,  $\|H \Sigma A x\|_2 = \|A x\|_2$  since  $H \Sigma$  is an isometry.

In the worst case,  $\text{rank}(A) = \prod p_d$ , which requires  $n = \Omega\left(R^2 \left(\sum_{d=2}^D p_d\right)^2 \cdot \prod p_d\right)$ . In overconstrained regression, it is often assumed that the number  $n$  of examples is at least a small polynomial in  $\text{rank}(A)$  [30], which implies this bound on  $n$ . Also, if, for example,  $A_i$  is sampled from a distribution with a rank deficient covariance, one may even have  $\text{rank}(A) \ll \prod p_d$ . A similar argument applies to the Tucker model as well in Theorem 2.

One should note that computing  $\Phi H \Sigma A$  takes  $(n \log n) \prod_{d=1}^D p_d$  time, provided the column sparsity  $s$  of  $\Phi$  is  $O(1)$ . This is  $O(\text{nnz}(A) \log n)$  time for dense matrices  $A$ , i.e., those with  $\text{nnz}(A) = \Omega(nd)$ , but in general, unlike our earlier results, is not  $O(\text{nnz}(A) \log n)$  time for sparse matrices. Analogous results can be obtained for the Tucker decomposition model, which we omit.

## I Intermediate Results

Here we introduce all intermediate results applied in our main analysis.

**Lemma 2.** Suppose for  $A = [A^{(1)}, A^{(2)}, \dots, A^{(m)}] \in \mathbb{R}^{n \times mp}$ , each  $A^{(i)} \in \mathbb{R}^{n \times p}$  is a column-wise sub-matrix of  $A$ . Given a vector  $v \in \mathbb{R}^m$ , we have

$$\left\| \sum_{i=1}^m A^{(i)} v_i \right\|_2 \leq \|A\|_2 \|v\|_2.$$

*Proof.* This is an extension of the Cauchy-Schwartz inequality. We have  $\sum_{i=1}^m A^{(i)} v_i = A(v \otimes I_p)$ , where  $\otimes$  is the Kronecker product. This implies

$$\left\| \sum_{i=1}^m A^{(i)} v_i \right\|_2 = \|A(v \otimes I_p)\|_2 \leq \|A\|_2 \|v \otimes I_p\|_2 = \|A\|_2 \|v\|_2.$$

□

**Lemma 3.** Given two sequences of unit vectors  $\{\phi_i\}_{i=1}^n$  and  $\{\psi_i\}_{i=1}^n$ , where  $\phi_i, \psi_i \in \mathbb{R}^{p_i}$  with  $\|\phi_i - \psi_i\|_2 \leq \varepsilon$  for all  $i \in [n]$ , we have

$$\|\phi_1 \otimes \phi_2 \otimes \dots \otimes \phi_n - \psi_1 \otimes \psi_2 \otimes \dots \otimes \psi_n\|_2 \leq (1 + \varepsilon)^n - 1.$$

*Proof.* Suppose for all  $i \in [n]$ , we have  $\psi_i = \phi_i + x_i$  for some vector  $x_i \in \mathbb{R}^{p_i}$ . Then we have

$$\begin{aligned} \|\phi_1 \otimes \dots \otimes \phi_n - \psi_1 \otimes \dots \otimes \psi_n\|_2 &= \|\phi_1 \otimes \dots \otimes \phi_n - (\phi_1 + x_1) \otimes \dots \otimes (\phi_n + x_n)\|_2 \\ &\leq \sum_{i=1}^n \|\phi_1 \otimes \dots \otimes x_i \otimes \dots \otimes \phi_n\|_2 \\ &\quad + \sum_{i=1}^n \sum_{j=1, j \neq i}^n \|\phi_1 \otimes \dots \otimes x_i \otimes \dots \otimes x_j \otimes \dots \otimes \phi_n\|_2 + \dots + \|x_1 \otimes \dots \otimes x_n\|_2 \\ &\leq \binom{n}{1} \varepsilon + \binom{n}{2} \varepsilon^2 + \dots + \binom{n}{n} \varepsilon^n = (1 + \varepsilon)^n - 1, \end{aligned}$$

where the last inequality is from the fact that  $\|v \otimes u\|_2 = \|v\|_2 \|u\|_2$  for any vectors  $v$  and  $u$ . □

**Lemma 4.** Suppose that  $A \in \mathbb{R}^{n \times \prod_{d=1}^2 p_d}$  has leverage scores  $\ell_i^2(A)$  for all  $i \in [n]$ . Then for any  $v_1, v_2 \in \mathbb{R}^{p_2}$ , the leverage scores of  $A^{v_1, v_2} = [A^{v_1}, A^{v_2}] \in \mathbb{R}^{n \times 2p_1}$  are bounded by  $\ell_i^2(A^{v_1, v_2}) \leq \ell_i^2(A)$ .

*Proof.* Let  $Z$  have orthonormal columns and have the same span as the column space of  $A$ . Then we have  $\ell_i^2(A) = \|e_i^\top Z\|_2^2$  for all  $i \in [n]$ . Since the column space of  $A^{v_1, v_2}$  is a subspace of the column space of  $A$ , we can always find a column sub-matrix  $Z_1 \in \mathbb{R}^{n \times 2p_1}$  of  $Z$  such that  $Z_1$  spans the column space of  $A^{v_1, v_2}$ . Therefore, for each  $i \in [n]$ , we have

$$\ell_i^2(A^{v_1, v_2}) = \|e_i^\top Z_1\|_2^2 \leq \|e_i^\top Z\|_2^2 = \ell_i^2(A).$$

□

**Lemma 5.** Suppose  $A \in \mathbb{R}^{n \times \prod_{d=1}^2 p_d}$  has leverage scores  $\ell_i^2(A)$  for all  $i \in [n]$ . Then for any  $v_i^{(r)} \in \mathbb{R}^{p_2}$ ,  $i \in [2]$ ,  $r \in [R]$  with  $R \leq p_2/2$ , the leverage scores of  $A^{\{v_i^{(r)}\}} = [A^{v_1^{(1)}}, \dots, A^{v_1^{(R)}}, A^{v_2^{(1)}}, \dots, A^{v_2^{(R)}}] \in \mathbb{R}^{n \times 2Rp_1}$  are bounded by  $\ell_i^2(A^{\{v_i^{(r)}\}}) \leq \ell_i^2(A)$ .

*Proof.* Let  $Z$  have orthonormal columns and have the same span as the column space of  $A$ . Then we have  $\ell_i^2(A) = \|e_i^\top Z\|_2^2$  for all  $i \in [n]$ . Since the column space of  $A^{\{v_i^{(r)}\}}$  is a subspace of the column space of  $A$ , as the column space of each  $A^{v_i^{(r)}}$  is a subspace of the column space of  $A$ , we can always find a column sub-matrix  $Z_1 \in \mathbb{R}^{n \times 2Rp_1}$  of  $Z$  such that  $Z_1$  spans the column space of  $A^{\{v_i^{(r)}\}}$ . Therefore, for each  $i \in [n]$ , we have

$$\ell_i^2(A^{\{v_i^{(r)}\}}) = \|e_i^\top Z_1\|_2^2 \leq \|e_i^\top Z\|_2^2 = \ell_i^2(A).$$

□

**Lemma 6.** For any  $v_1, v_2 \in \mathcal{B}_{p_2}$ , suppose  $\langle v_1, v_2 \rangle = 0$ , and  $\bar{v}_1, \bar{v}_2 \in \mathcal{B}_{p_2}$  are vectors such that  $\|v_1 - \bar{v}_1\|_2 \leq \eta_0$  and  $\|v_2 - \bar{v}_2\|_2 \leq \eta_0$ . Then we have

$$\rho_{\text{Fin}}([A^{v_1}, A^{v_2}], [A^{\bar{v}_1}, A^{\bar{v}_2}]) \leq 2\kappa_A \eta_0.$$

*Proof.* Denote  $A^{v_1, v_2} = [A^{v_1}, A^{v_2}]$ . From a perturbation bound for orthogonal projections given in [14], we have

$$\rho_{\text{Fin}}(A^{v_1, v_2}, A^{\bar{v}_1, \bar{v}_2}) \leq \frac{\|A^{v_1, v_2} - A^{\bar{v}_1, \bar{v}_2}\|_2}{\sigma_{\min}(A^{v_1, v_2})}. \quad (46)$$

We first provide an upper bound on the numerator as

$$\begin{aligned} \|A^{v_1, v_2} - A^{\bar{v}_1, \bar{v}_2}\|_2 &= \left\| \left[ \sum_{i=1}^{p_2} A^{(i)}(v_{1,i} - \bar{v}_{1,i}), \sum_{i=1}^{p_2} A^{(i)}(v_{2,i} - \bar{v}_{2,i}) \right] \right\|_2 \\ &\leq \left\| \sum_{i=1}^{p_2} A^{(i)}(v_{1,i} - \bar{v}_{1,i}) \right\|_2 + \left\| \sum_{i=1}^{p_2} A^{(i)}(v_{2,i} - \bar{v}_{2,i}) \right\|_2 \\ &\leq 2\sigma_{\max}(A)\eta_0, \end{aligned} \quad (47)$$

where the last inequality is from Lemma 2.

Next, we provide a lower bound on the denominator. Let  $[u_1^\top, u_2^\top]^\top$  be a unit vector corresponding to the smallest singular value of  $A^{v_1, v_2}$ , where  $u_1, u_2 \in \mathbb{R}^{p_1}$ . Then we have

$$\begin{aligned} \sigma_{\min}(A^{v_1, v_2}) &= \left\| A^{v_1, v_2} \begin{bmatrix} u_1 \\ u_2 \end{bmatrix} \right\|_2 = \|A(v_1 \otimes u_1 + v_2 \otimes u_2)\|_2 \geq \sigma_{\min}(A) \|v_1 \otimes u_1 + v_2 \otimes u_2\|_2 \\ &= \sigma_{\min}(A) \sqrt{\|v_1 \otimes u_1\|_2^2 + \|v_2 \otimes u_2\|_2^2 + 2\langle v_1 \otimes u_1, v_2 \otimes u_2 \rangle} \\ &= \sigma_{\min}(A) \sqrt{\|u_1\|_2^2 + \|u_2\|_2^2 + 2 \sum_{i=1}^{p_2} \sum_{j=1}^{p_1} v_{1,i} u_{1,j} v_{2,i} u_{2,j}} \\ &= \sigma_{\min}(A) \sqrt{1 + 2\langle v_1, v_2 \rangle \langle u_1, u_2 \rangle} = \sigma_{\min}(A), \end{aligned} \quad (48)$$

where the last equality is from the condition  $\langle v_1, v_2 \rangle = 0$ . We finish the proof by combining (46), (47), and (48). □

**Lemma 7.** For all  $i \in [2]$  and  $r \in [R]$ ,  $v_i^{(r)} \in \mathcal{B}_{p_2}$ . Suppose for all  $i \in [2]$ ,  $r \in [R]$ ,  $q \in [R] \setminus \{r\}$ , we have  $\langle v_i^{(r)}, v_i^{(q)} \rangle = \langle v_1^{(r)}, v_2^{(r)} \rangle = 0$ . Further suppose for all  $i \in [2]$  and  $r \in [R]$ ,  $\bar{v}_i^{(r)} \in \mathcal{B}_{p_2}$  is a vector such that  $\|v_i^{(r)} - \bar{v}_i^{(r)}\|_2 \leq \eta_0$ . Denote  $A^{\{v_i^{(r)}\}} = [A^{v_1^{(1)}}, \dots, A^{v_1^{(R)}}, A^{v_2^{(1)}}, \dots, A^{v_2^{(R)}}]$ . Then we have

$$\rho_{\text{Fin}}\left(A^{\{v_i^{(r)}\}}, A^{\{\bar{v}_i^{(r)}\}}\right) \leq 2R\kappa_A \eta_0.$$

*Proof.* From the perturbation bound for orthogonal projection given in [14], we have

$$\rho_{\text{Fin}}\left(A^{\{v_i^{(r)}\}}, A^{\{\bar{v}_i^{(r)}\}}\right) \leq \frac{\left\| A^{\{v_i^{(r)}\}} - A^{\{\bar{v}_i^{(r)}\}} \right\|_2}{\sigma_{\min}\left(A^{\{v_i^{(r)}\}}\right)}. \quad (49)$$

We first upper bound the numerator as

$$\begin{aligned}
\left\| A\{v_i^{(r)}\} - A\{\bar{v}_i^{(r)}\} \right\|_2 &= \left\| \left[ \sum_{j=1}^{p_2} A_j \left( v_{1,j}^{(1)} - \bar{v}_{1,j}^{(1)} \right), \dots, \sum_{j=1}^{p_2} A_j \left( v_{1,j}^{(R)} - \bar{v}_{1,j}^{(R)} \right), \right. \right. \\
&\quad \left. \left. \sum_{j=1}^{p_2} A_j \left( v_{2,j}^{(1)} - \bar{v}_{2,j}^{(1)} \right), \dots, \sum_{j=1}^{p_2} A_j \left( v_{2,j}^{(R)} - \bar{v}_{2,j}^{(R)} \right) \right] \right\|_2 \\
&\leq \sum_{r=1}^R \left\| \sum_{j=1}^{p_2} A_j \left( v_{1,j}^{(r)} - \bar{v}_{1,j}^{(r)} \right) \right\|_2 + \sum_{r=1}^R \left\| \sum_{j=1}^{p_2} A_j \left( v_{2,j}^{(r)} - \bar{v}_{2,j}^{(r)} \right) \right\|_2 \leq 2R\sigma_{\max}(A)\eta_0, \tag{50}
\end{aligned}$$

where the last inequality is from Lemma 2.

Next, we provide a lower bound on the denominator. Let  $[u_1^{(1)\top}, \dots, u_1^{(R)\top}, u_2^{(1)\top}, \dots, u_2^{(R)\top}]^\top \in \mathbb{R}^{2Rp_1}$  be a unit vector corresponding to the smallest singular value of  $A\{v_i^{(r)}\}$ , where  $u_i^{(r)} \in \mathbb{R}^{p_1}$  for all  $i \in [2]$  and  $r \in [R]$ . Then we have

$$\begin{aligned}
\sigma_{\min} \left( A\{v_i^{(r)}\} \right) &= \left\| A\{v_i^{(r)}\} [u_1^{(1)\top}, \dots, u_1^{(R)\top}, u_2^{(1)\top}, \dots, u_2^{(R)\top}]^\top \right\|_2 \\
&= \left\| A \cdot \left( \sum_{r=1}^R v_1^{(r)} \otimes u_1^{(r)} + v_2^{(r)} \otimes u_2^{(r)} \right) \right\|_2 \geq \sigma_{\min}(A) \left\| \sum_{r=1}^R \left( v_1^{(r)} \otimes u_1^{(r)} + v_2^{(r)} \otimes u_2^{(r)} \right) \right\|_2 \\
&= \sigma_{\min}(A) \sqrt{ \sum_{r=1}^R \left( \|u_1^{(r)}\|_2^2 + \|u_2^{(r)}\|_2^2 \right) + 2 \sum_{r=1}^R \sum_{j=1}^{p_2} \sum_{k=1}^{p_1} v_{1,j}^{(r)} u_{1,k}^{(r)} v_{2,j}^{(r)} u_{2,k}^{(r)} } \\
&\quad + 2 \sum_{i=1}^2 \sum_{r=1}^{R-1} \sum_{q=r+1}^R \sum_{j=1}^{p_2} \sum_{k=1}^{p_1} v_{i,j}^{(r)} u_{i,k}^{(r)} v_{i,j}^{(q)} u_{i,k}^{(q)} } \\
&= \sigma_{\min}(A) \sqrt{ 1 + 2 \sum_{r=1}^R \langle v_1^{(r)}, v_2^{(r)} \rangle \langle u_1^{(r)}, u_2^{(r)} \rangle + 2 \sum_{i=1}^2 \sum_{r=1}^{R-1} \sum_{q=r+1}^R \langle v_i^{(r)}, v_i^{(q)} \rangle \langle u_i^{(r)}, u_i^{(q)} \rangle } \\
&= \sigma_{\min}(A), \tag{51}
\end{aligned}$$

where the last equality uses the conditions that for all  $i \in [2]$  and  $r \in [R]$ ,  $\langle v_i^{(r)}, v_i^{(q)} \rangle = \langle v_1^{(r)}, v_2^{(r)} \rangle = 0$  for  $q \in [R] \setminus \{r\}$ . We finish the proof by combining (49), (50), and (51).  $\square$

**Lemma 8.** For all  $d \in [D] \setminus \{1\}$ ,  $\theta_d, \phi_d \in \mathcal{B}_{p_d}$ . Suppose there exists an  $i \in [D] \setminus \{1\}$  such that  $\langle \theta_i, \phi_i \rangle = 0$ . Further suppose for all  $d \in [D] \setminus \{1\}$ ,  $\bar{\theta}_d, \bar{\phi}_d \in \mathcal{B}_{p_d}$  are vectors such that  $\|\theta_d - \bar{\theta}_d\|_2 \leq \eta_0$  and  $\|\phi_d - \bar{\phi}_d\|_2 \leq \eta_0$ . Then we have

$$\rho_{\text{Fin}} \left( \left[ A\{\theta_{\setminus 1}\}, A\{\phi_{\setminus 1}\} \right], \left[ A\{\bar{\theta}_{\setminus 1}\}, A\{\bar{\phi}_{\setminus 1}\} \right] \right) \leq 2\kappa_A \left( (1 + \eta_0)^{D-1} - 1 \right).$$

*Proof.* Let  $A^{\vartheta_{\setminus 1}, \varphi_{\setminus 1}} = [A\{\theta_{\setminus 1}\}, A\{\phi_{\setminus 1}\}] \in \mathbb{R}^{n \times 2p_1}$ . From the perturbation bound for orthogonal projection given in [14], we have

$$\rho_{\text{Fin}} \left( A^{\vartheta_{\setminus 1}, \varphi_{\setminus 1}}, A^{\bar{\vartheta}, \bar{\varphi}} \right) \leq \frac{\|A^{\vartheta_{\setminus 1}, \varphi_{\setminus 1}} - A^{\bar{\vartheta}, \bar{\varphi}}\|_2}{\sigma_{\min}(A^{\vartheta_{\setminus 1}, \varphi_{\setminus 1}})}. \tag{52}$$

We denote  $\sum_{j_2 \dots j_D} = \sum_{j_D=1}^{p_D} \dots \sum_{j_2=1}^{p_2}$ . We first provide an upper bound on the numerator:

$$\begin{aligned}
& \left\| A^{\vartheta_{\setminus 1}, \varphi_{\setminus 1}} - A^{\bar{\vartheta}, \bar{\varphi}} \right\|_2 \\
&= \left\| \left[ \sum_{j_2 \dots j_D} A^{(j_D, \dots, j_2)} (\theta_{D,j_D} \dots \theta_{2,j_2} - \bar{\theta}_{D,j_D} \dots \bar{\theta}_{2,j_2}), \sum_{j_2 \dots j_D} A^{(j_D, \dots, j_2)} (\phi_{D,j_D} \dots \phi_{2,j_2} - \bar{\phi}_{D,j_D} \dots \bar{\phi}_{2,j_2}) \right] \right\|_2 \\
&\leq \left\| \sum_{j_2 \dots j_D} A^{(j_D, \dots, j_2)} \cdot (\theta_{D,j_D} \dots \theta_{2,j_2} - \bar{\theta}_{D,j_D} \dots \bar{\theta}_{2,j_2}) \right\|_2 + \left\| \sum_{j_2 \dots j_D} A^{(j_D, \dots, j_2)} \cdot (\phi_{D,j_D} \dots \phi_{2,j_2} - \bar{\phi}_{D,j_D} \dots \bar{\phi}_{2,j_2}) \right\|_2 \\
&\leq \sigma_{\max}(A) \cdot (\|\theta_D \otimes \dots \otimes \theta_2 - \bar{\theta}_D \otimes \dots \otimes \bar{\theta}_2\|_2 + \|\phi_D \otimes \dots \otimes \phi_2 - \bar{\phi}_D \otimes \dots \otimes \bar{\phi}_2\|_2) \\
&\leq 2\sigma_{\max}(A) ((1 + \eta_0)^{D-1} - 1), \tag{53}
\end{aligned}$$

where the second inequality is from Lemma 2 and the last inequality is from Lemma 3.

Next, we provide a lower bound on the denominator. Let  $[u_1^\top, u_2^\top]^\top$  be a unit vector corresponding to the smallest singular value of  $A^{\vartheta_{\setminus 1}, \varphi_{\setminus 1}}$ , where  $u_1, u_2 \in \mathbb{R}^{p_1}$ . Then we have

$$\begin{aligned}
\sigma_{\min}(A^{\vartheta_{\setminus 1}, \varphi_{\setminus 1}}) &= \left\| A^{\vartheta_{\setminus 1}, \varphi_{\setminus 1}} \begin{bmatrix} u_1 \\ u_2 \end{bmatrix} \right\|_2 = \|A(\theta_D \otimes \dots \otimes \theta_2 \otimes u_1 + \phi_D \otimes \dots \otimes \phi_2 \otimes u_2)\|_2 \\
&\geq \sigma_{\min}(A) \|\theta_D \otimes \dots \otimes \theta_2 \otimes u_1 + \phi_D \otimes \dots \otimes \phi_2 \otimes u_2\|_2 \\
&= \sigma_{\min}(A) \sqrt{\|\theta_D \otimes \dots \otimes \theta_2 \otimes u_1\|_2^2 + \|\phi_D \otimes \dots \otimes \phi_2 \otimes u_2\|_2^2} \\
&\quad + 2\langle \theta_D \otimes \dots \otimes \theta_2 \otimes u_1, \phi_D \otimes \dots \otimes \phi_2 \otimes u_2 \rangle \\
&= \sigma_{\min}(A) \sqrt{\|u_1\|_2^2 + \|u_2\|_2^2 + 2 \sum_{j_2 \dots j_D} \sum_{j_1=1}^{p_1} \theta_{D,j_D} \dots \theta_{2,j_2} u_{1,j_1} \cdot \phi_{D,j_D} \dots \phi_{2,j_2} u_{2,j_1}} \\
&= \sigma_{\min}(A) \sqrt{1 + 2\langle \theta_D, \phi_D \rangle \dots \langle \theta_2, \phi_2 \rangle \langle u_1, u_2 \rangle} = \sigma_{\min}(A), \tag{54}
\end{aligned}$$

where the last inequality is from  $\langle \theta_i, \phi_i \rangle = 0$  for some  $i \in \{2, \dots, D\}$ . We finish the proof by combining (52), (53) and (54).  $\square$

**Lemma 9.** For all  $d \in [D] \setminus \{1\}$  and  $r \in [R]$ ,  $\theta_d^{(r)}, \phi_d^{(r)} \in \mathcal{B}_{p_d}$ . Suppose that for any  $r, q \in [R]$ , there exists an  $i \in [D] \setminus \{1\}$  such that  $\langle \theta_i^{(r)}, \phi_i^{(q)} \rangle = 0$ , and further, for all  $r \in [R-1]$ ,  $q \in [R] \setminus [r]$ , there exist  $j, k \in [D] \setminus \{1\}$  such that  $\langle \theta_j^{(r)}, \theta_j^{(q)} \rangle = 0$  and  $\langle \phi_k^{(r)}, \phi_k^{(q)} \rangle = 0$ . Further suppose for all  $d \in [D] \setminus \{1\}$  and  $r \in [R]$ ,  $\bar{\theta}_d^{(r)}, \bar{\phi}_d^{(r)} \in \mathcal{B}_{p_d}$  are vectors such that  $\|\theta_d^{(r)} - \bar{\theta}_d^{(r)}\|_2 \leq \eta_0$  and  $\|\phi_d^{(r)} - \bar{\phi}_d^{(r)}\|_2 \leq \eta_0$ . Then we have

$$\rho_{\text{Fin}} \left( \left[ A^{\{\theta_{\setminus 1}^{(r)}\}}, A^{\{\phi_{\setminus 1}^{(r)}\}} \right], \left[ A^{\{\bar{\theta}_{\setminus 1}^{(r)}\}}, A^{\{\bar{\phi}_{\setminus 1}^{(r)}\}} \right] \right) \leq 2R\kappa_A ((1 + \eta_0)^{D-1} - 1).$$

*Proof.* Denote  $A^{\{\vartheta_{\setminus 1}^{(r)}, \varphi_{\setminus 1}^{(r)}\}} = \begin{bmatrix} A^{\{\theta_{\setminus 1}^{(r)}\}}, A^{\{\phi_{\setminus 1}^{(r)}\}} \end{bmatrix} \in \mathbb{R}^{n \times 2Rp_1}$ . From the perturbation bound on orthogonal projection given in [14], we have

$$\rho_{\text{Fin}} \left( A^{\{\vartheta_{\setminus 1}^{(r)}, \varphi_{\setminus 1}^{(r)}\}}, A^{\{\bar{\vartheta}_{\setminus 1}^{(r)}, \bar{\varphi}_{\setminus 1}^{(r)}\}} \right) \leq \frac{\left\| A^{\{\vartheta_{\setminus 1}^{(r)}, \varphi_{\setminus 1}^{(r)}\}} - A^{\{\bar{\vartheta}_{\setminus 1}^{(r)}, \bar{\varphi}_{\setminus 1}^{(r)}\}} \right\|_2}{\sigma_{\min} \left( A^{\{\vartheta_{\setminus 1}^{(r)}, \varphi_{\setminus 1}^{(r)}\}} \right)}. \tag{55}$$



We denote  $\sum_{j_2 \dots j_D} = \sum_{j_D=1}^{p_D} \dots \sum_{j_2=1}^{p_2}$ . We first upper bound the numerator as

$$\begin{aligned}
& \left\| A \left\{ \vartheta_{\setminus 1}^{(r)}, \varphi_{\setminus 1}^{(r)} \right\} - A \left\{ \bar{\vartheta}_{\setminus 1}^{(r)}, \bar{\varphi}_{\setminus 1}^{(r)} \right\} \right\|_2 \\
&= \left\| \left[ \sum_{j_2 \dots j_D} A^{(j_D, \dots, j_2)} \left( \theta_{D,j_D}^{(1)} \dots \theta_{2,j_2}^{(1)} - \bar{\theta}_{D,j_D}^{(1)} \dots \bar{\theta}_{2,j_2}^{(1)} \right), \dots, \sum_{j_2 \dots j_D} A^{(j_D, \dots, j_2)} \left( \theta_{D,j_D}^{(R)} \dots \theta_{2,j_2}^{(R)} - \bar{\theta}_{D,j_D}^{(R)} \dots \bar{\theta}_{2,j_2}^{(R)} \right), \right. \right. \\
&\quad \left. \sum_{j_2 \dots j_D} A^{(j_D, \dots, j_2)} \left( \phi_{D,j_D}^{(1)} \dots \phi_{2,j_2}^{(1)} - \bar{\phi}_{D,j_D}^{(1)} \dots \bar{\phi}_{2,j_2}^{(1)} \right), \dots, \sum_{j_2 \dots j_D} A^{(j_D, \dots, j_2)} \left( \phi_{D,j_D}^{(R)} \dots \phi_{2,j_2}^{(R)} - \bar{\phi}_{D,j_D}^{(R)} \dots \bar{\phi}_{2,j_2}^{(R)} \right) \right] \right\|_2 \\
&\leq \sum_{r=1}^R \left\| \sum_{j_2 \dots j_D} A^{(j_D, \dots, j_2)} \cdot \left( \theta_{D,j_D}^{(r)} \dots \theta_{2,j_2}^{(r)} - \bar{\theta}_{D,j_D}^{(r)} \dots \bar{\theta}_{2,j_2}^{(r)} \right) \right\|_2 + \left\| \sum_{j_2 \dots j_D} A^{(j_D, \dots, j_2)} \cdot \left( \phi_{D,j_D}^{(r)} \dots \phi_{2,j_2}^{(r)} - \bar{\phi}_{D,j_D}^{(r)} \dots \bar{\phi}_{2,j_2}^{(r)} \right) \right\|_2 \\
&\leq \sigma_{\max}(A) \cdot \left( \sum_{r=1}^R \left\| \theta_D^{(r)} \otimes \dots \otimes \theta_2^{(r)} - \bar{\theta}_D^{(r)} \otimes \dots \otimes \bar{\theta}_2^{(r)} \right\|_2 + \left\| \phi_D^{(r)} \otimes \dots \otimes \phi_2^{(r)} - \bar{\phi}_D^{(r)} \otimes \dots \otimes \bar{\phi}_2^{(r)} \right\|_2 \right) \\
&\leq 2R\sigma_{\max}(A) \left( (1 + \eta_0)^{D-1} - 1 \right), \tag{56}
\end{aligned}$$

where the second inequality is from Lemma 2 and the last inequality is from Lemma 3.

Next, we lower bound the denominator. Let  $\left[ u_1^{(1)\top}, \dots, u_1^{(R)\top}, u_2^{(1)\top}, \dots, u_2^{(R)\top} \right]^\top \in \mathbb{R}^{2Rp_1}$  be a unit vector corresponding to the smallest singular value of  $A \left\{ \vartheta_{\setminus 1}^{(r)}, \varphi_{\setminus 1}^{(r)} \right\}$ , where  $u_i^{(r)} \in \mathbb{R}^{p_1}$  for all  $i \in [2]$  and  $r \in [R]$ . Then we have

$$\begin{aligned}
\sigma_{\min} \left( A \left\{ \vartheta_{\setminus 1}^{(r)}, \varphi_{\setminus 1}^{(r)} \right\} \right) &= \left\| A \left\{ \vartheta_{\setminus 1}^{(r)}, \varphi_{\setminus 1}^{(r)} \right\} \left[ u_1^{(1)\top}, \dots, u_1^{(R)\top}, u_2^{(1)\top}, \dots, u_2^{(R)\top} \right]^\top \right\|_2 \\
&= \left\| A \cdot \left( \sum_{r=1}^R \theta_D^{(r)} \otimes \dots \otimes \theta_2^{(r)} \otimes u_1^{(r)} + \phi_D^{(r)} \otimes \dots \otimes \phi_2^{(r)} \otimes u_2^{(r)} \right) \right\|_2 \\
&\geq \sigma_{\min}(A) \left\| \sum_{r=1}^R \theta_D^{(r)} \otimes \dots \otimes \theta_2^{(r)} \otimes u_1^{(r)} + \phi_D^{(r)} \otimes \dots \otimes \phi_2^{(r)} \otimes u_2^{(r)} \right\|_2 \\
&= \sigma_{\min}(A) \sqrt{ \sum_{r=1}^R \left( \|u_1^{(r)}\|_2^2 + \|u_2^{(r)}\|_2^2 \right) + 2 \sum_{r=1}^R \sum_{q=1}^R \sum_{j_1 \dots j_D} \theta_{D,j_D}^{(r)} \dots \theta_{2,j_2}^{(r)} u_{1,j_1}^{(r)} \cdot \phi_{D,j_D}^{(q)} \dots \phi_{2,j_2}^{(q)} u_{2,j_1}^{(q)} } \\
&\quad + 2 \sum_{r=1}^{R-1} \sum_{q=r+1}^R \sum_{j_1 \dots j_D} \left( \theta_{D,j_D}^{(r)} \dots \theta_{2,j_2}^{(r)} u_{1,j_1}^{(r)} \cdot \theta_{D,j_D}^{(q)} \dots \theta_{2,j_2}^{(q)} u_{1,j_1}^{(q)} + \phi_{D,j_D}^{(r)} \dots \phi_{2,j_2}^{(r)} u_{2,j_1}^{(r)} \cdot \phi_{D,j_D}^{(q)} \dots \phi_{2,j_2}^{(q)} u_{2,j_1}^{(q)} \right) } \\
&= \sigma_{\min}(A) \sqrt{ 1 + 2 \sum_{r=1}^R \sum_{q=1}^R \langle \theta_D^{(r)}, \phi_D^{(q)} \rangle \dots \langle \theta_2^{(r)}, \phi_2^{(q)} \rangle \langle u_1^{(r)}, u_2^{(q)} \rangle } \\
&\quad + 2 \sum_{r=1}^{R-1} \sum_{q=r+1}^R \left( \langle \theta_D^{(r)}, \theta_D^{(q)} \rangle \dots \langle \theta_2^{(r)}, \theta_2^{(q)} \rangle \langle u_1^{(r)}, u_1^{(q)} \rangle + \langle \phi_D^{(r)}, \phi_D^{(q)} \rangle \dots \langle \phi_2^{(r)}, \phi_2^{(q)} \rangle \langle u_2^{(r)}, u_2^{(q)} \rangle \right) } \\
&= \sigma_{\min}(A), \tag{57}
\end{aligned}$$

where the last inequality is from the conditions on  $\theta_d^{(r)}$  and  $\phi_d^{(r)}$ . We finish the proof by combining (55), (56), and (57).  $\square$

**Lemma 10.** For all  $d \in [D] \setminus \{1\}$  and  $r \in [R]$ ,  $\theta_d^{(r_d)}, \phi_d^{(r_d)} \in \mathcal{B}_{p_d}$ . Suppose that for any  $r_d, q_d \in [R_d]$ ,  $d \in [R] \setminus \{1\}$ , there exists an  $i \in [D] \setminus \{1\}$  such that  $\langle \theta_i^{(r)}, \phi_i^{(q)} \rangle = 0$ , and for all  $r \in [R-1]$ ,  $q \in [R] \setminus [r]$ , there exist  $j, k \in [D] \setminus \{1\}$  such that  $\langle \theta_j^{(r)}, \theta_j^{(q)} \rangle = 0$  and  $\langle \phi_k^{(r)}, \phi_k^{(q)} \rangle = 0$ . Further suppose for all  $d \in [D] \setminus \{1\}$  and  $r \in [R]$ ,  $\bar{\theta}_d^{(r)}, \bar{\phi}_d^{(r)} \in \mathcal{B}_{p_d}$  are vectors such that  $\|\theta_d^{(r)} - \bar{\theta}_d^{(r)}\|_2 \leq \eta_0$  and  $\|\phi_d^{(r)} - \bar{\phi}_d^{(r)}\|_2 \leq \eta_0$ . Then for some constant  $C$ , we have

$$\rho_{\text{Fin}} \left( \left[ A \left\{ \vartheta_{\setminus 1}^{(r)} \right\}, A \left\{ \phi_{\setminus 1}^{(r)} \right\} \right], \left[ A \left\{ \bar{\vartheta}_{\setminus 1}^{(r)} \right\}, A \left\{ \bar{\phi}_{\setminus 1}^{(r)} \right\} \right] \right) \leq 2C\kappa_A \left( (1 + \eta_0)^{D-1} - 1 \right) R_1 \sqrt{nnz(G)}.$$

*Proof.* Denote  $A^{\{\vartheta_{\setminus 1}^{\{r_d\}}, \varphi_{\setminus 1}^{\{r_d\}}\}} = \begin{bmatrix} A^{\{\theta_{\setminus 1}^{\{r_d\}}\}}, A^{\{\phi_{\setminus 1}^{\{r_d\}}\}} \end{bmatrix} \in \mathbb{R}^{n \times 2R_1 p_1}$ . From the perturbation bound for orthogonal projection given in [14], we have

$$\rho_{\text{Fin}} \left( A^{\{\vartheta_{\setminus 1}^{\{r_d\}}, \varphi_{\setminus 1}^{\{r_d\}}\}}, A^{\{\bar{\vartheta}_{\setminus 1}^{\{r_d\}}, \bar{\varphi}_{\setminus 1}^{\{r_d\}}\}} \right) \leq \frac{\left\| A^{\{\vartheta_{\setminus 1}^{\{r_d\}}, \varphi_{\setminus 1}^{\{r_d\}}\}} - A^{\{\bar{\vartheta}_{\setminus 1}^{\{r_d\}}, \bar{\varphi}_{\setminus 1}^{\{r_d\}}\}} \right\|_2}{\sigma_{\min} \left( A^{\{\vartheta_{\setminus 1}^{\{r_d\}}, \varphi_{\setminus 1}^{\{r_d\}}\}} \right)}. \quad (58)$$

We denote  $\sum_{j_2 \dots j_D} = \sum_{j_2=1}^{p_2} \dots \sum_{j_D=1}^{p_D}$ ,  $\sum_{r_2 \dots r_D} = \sum_{r_2=1}^{R_2} \dots \sum_{r_D=1}^{R_D}$ , and  $\sum_{r_1 \dots r_D} = \sum_{r_1=1}^{R_1} \dots \sum_{r_D=1}^{R_D}$ . We first upper bound the numerator as

$$\begin{aligned} & \left\| A^{\{\vartheta_{\setminus 1}^{\{r_d\}}, \varphi_{\setminus 1}^{\{r_d\}}\}} - A^{\{\bar{\vartheta}_{\setminus 1}^{\{r_d\}}, \bar{\varphi}_{\setminus 1}^{\{r_d\}}\}} \right\|_2 \\ &= \left\| \begin{bmatrix} \sum_{r_2 \dots r_D} \sum_{j_2 \dots j_D} G(1, r_2, \dots, r_D) A^{(j_D, \dots, j_2)} \left( \theta_{D, j_D}^{(r_D)} \dots \theta_{2, j_2}^{(r_2)} - \bar{\theta}_{D, j_D}^{(r_D)} \dots \bar{\theta}_{2, j_2}^{(r_2)} \right), \dots, \\ \sum_{r_2 \dots r_D} \sum_{j_2 \dots j_D} G(R_1, r_2, \dots, r_D) A^{(j_D, \dots, j_2)} \left( \theta_{D, j_D}^{(r_D)} \dots \theta_{2, j_2}^{(r_2)} - \bar{\theta}_{D, j_D}^{(r_D)} \dots \bar{\theta}_{2, j_2}^{(r_2)} \right), \\ \sum_{r_2 \dots r_D} \sum_{j_2 \dots j_D} G(1, r_2, \dots, r_D) A^{(j_D, \dots, j_2)} \left( \phi_{D, j_D}^{(r_D)} \dots \phi_{2, j_2}^{(r_2)} - \bar{\phi}_{D, j_D}^{(r_D)} \dots \bar{\phi}_{2, j_2}^{(r_2)} \right), \dots, \\ \sum_{r_2 \dots r_D} \sum_{j_2 \dots j_D} G(R_1, r_2, \dots, r_D) A^{(j_D, \dots, j_2)} \left( \phi_{D, j_D}^{(r_D)} \dots \phi_{2, j_2}^{(r_2)} - \bar{\phi}_{D, j_D}^{(r_D)} \dots \bar{\phi}_{2, j_2}^{(r_2)} \right) \end{bmatrix} \right\|_2 \\ &\leq \sum_{r_1 \dots r_D} \left\| \sum_{j_2 \dots j_D} G(r_1, \dots, r_D) A^{(j_D, \dots, j_2)} \left( \theta_{D, j_D}^{(r_D)} \dots \theta_{2, j_2}^{(r_2)} - \bar{\theta}_{D, j_D}^{(r_D)} \dots \bar{\theta}_{2, j_2}^{(r_2)} \right) \right\|_2 \\ &\quad + \left\| \sum_{j_2 \dots j_D} G(r_1, \dots, r_D) A^{(j_D, \dots, j_2)} \left( \phi_{D, j_D}^{(r_D)} \dots \phi_{2, j_2}^{(r_2)} - \bar{\phi}_{D, j_D}^{(r_D)} \dots \bar{\phi}_{2, j_2}^{(r_2)} \right) \right\|_2 \\ &\leq \sigma_{\max}(A) \left( \sum_{r_1 \dots r_D} |G(r_1, \dots, r_D)| \cdot \left\| \theta_D^{(r_D)} \otimes \dots \otimes \theta_2^{(r_2)} - \bar{\theta}_D^{(r_D)} \otimes \dots \otimes \bar{\theta}_2^{(r_2)} \right\|_2 \right. \\ &\quad \left. + |G(r_1, \dots, r_D)| \cdot \left\| \phi_D^{(r_D)} \otimes \dots \otimes \phi_2^{(r_2)} - \bar{\phi}_D^{(r_D)} \otimes \dots \otimes \bar{\phi}_2^{(r_2)} \right\|_2 \right) \\ &\leq 2 \|\text{vec}(G)\|_1 \cdot \sigma_{\max}(A) ((1 + \eta_0)^{D-1} - 1), \end{aligned} \quad (59)$$

where the second inequality is from Lemma 2 and the last inequality is from Lemma 3.

Next, we provide a lower bound on the denominator. Let  $\left[ u_1^{(1)\top}, \dots, u_1^{(R_1)\top}, u_2^{(1)\top}, \dots, u_2^{(R_1)\top} \right]^\top \in \mathbb{R}^{2R_1 p_1}$  be a unit vector corresponding to the smallest singular value of  $A^{\{\vartheta_{\setminus 1}^{\{r_d\}}, \varphi_{\setminus 1}^{\{r_d\}}\}}$ , where  $u_i^{(r_1)} \in \mathbb{R}^{p_1}$  for all  $i \in [2]$  and  $r_1 \in [R_1]$ . Denote  $\sum_{j_1 \dots j_D} = \sum_{j_1=1}^{p_1} \dots \sum_{j_D=1}^{p_D}$ ,  $\sum_{q_1 \dots q_D} = \sum_{q_1=1}^{p_1} \dots \sum_{q_D=1}^{p_D}$ ,  $\sum_{r_d, j_d, q_d} = \sum_{r_1 \dots r_D} \sum_{j_1 \dots j_D} \sum_{q_1 \dots q_D} \mathbb{1}_{G(r_1, \dots, r_D) \neq 0}$  as the indicator function that is 1 if  $G(r_1, \dots, r_D) \neq 0$  and is 0 otherwise, and  $u_{\min}^{(r_1)} =$

$$\begin{aligned}
& \min_{r_1} \left\{ \left\| u_1^{(r_1)} \right\|_2^2 + \left\| u_2^{(r_1)} \right\|_2^2 \neq 0 \right\}. \text{ Then we have} \\
& \sigma_{\min} \left( A^{\left\{ \vartheta_{\setminus 1}^{\{r_d\}}, \varphi_{\setminus 1}^{\{r_d\}} \right\}} \right) = \left\| A^{\left\{ \vartheta_{\setminus 1}^{\{r_d\}}, \varphi_{\setminus 1}^{\{r_d\}} \right\}} \left[ u_1^{(1)\top}, \dots, u_1^{(R_1)\top}, u_2^{(1)\top}, \dots, u_2^{(R_1)\top} \right]^\top \right\|_2 \\
& = \left\| A \cdot \left( \sum_{r_1, \dots, r_D} G(r_1, \dots, r_D) \left( \theta_D^{(r_D)} \otimes \dots \otimes \theta_2^{(r_2)} \otimes u_1^{(r_1)} + \phi_D^{(r_D)} \otimes \dots \otimes \phi_2^{(r_2)} \otimes u_2^{(r_1)} \right) \right) \right\|_2 \\
& \geq \sigma_{\min}(A) \left\| \sum_{r_1, \dots, r_D} G(r_1, \dots, r_D) \left( \theta_D^{(r_D)} \otimes \dots \otimes \theta_2^{(r_2)} \otimes u_1^{(r_1)} + \phi_D^{(r_D)} \otimes \dots \otimes \phi_2^{(r_2)} \otimes u_2^{(r_1)} \right) \right\|_2 \\
& = \sigma_{\min}(A) \sqrt{\sum_{r_1, \dots, r_D} G^2(r_1, \dots, r_D) \left( \left\| u_1^{(r_1)} \right\|_2^2 + \left\| u_2^{(r_1)} \right\|_2^2 \right)} \\
& \quad + 2 \sum_{r_d, j_d, q_d} G(r_1, \dots, r_D) \left( \theta_{D, j_D}^{(r_D)} \dots \theta_{2, j_2}^{(r_2)} u_{1, j_1}^{(r_1)} \phi_{D, j_D}^{(q_D)} \dots \phi_{2, j_2}^{(q_2)} u_{2, j_1}^{(q_1)} \right. \\
& \quad \left. + \theta_{D, j_D}^{(r_D)} \dots \theta_{2, j_2}^{(r_2)} u_{1, j_1}^{(r_1)} \theta_{D, j_D}^{(q_D)} \dots \theta_{2, j_2}^{(q_2)} u_{1, j_1}^{(q_1)} + \phi_{D, j_D}^{(r_D)} \dots \phi_{2, j_2}^{(r_2)} u_{2, j_1}^{(r_1)} \phi_{D, j_D}^{(q_D)} \dots \phi_{2, j_2}^{(q_2)} u_{2, j_1}^{(q_1)} \right) \\
& \geq \sigma_{\min}(A) \sqrt{\min_{r_1} \sum_{r_2, \dots, r_D} G^2(r_1, \dots, r_D) + 2 \sum_{r_d, j_d, q_d} G(r_1, \dots, r_D) \left( \langle \theta_D^{(r_D)}, \phi_D^{(q_D)} \rangle \dots \langle \theta_2^{(r_2)}, \phi_2^{(q_2)} \rangle \langle u_1^{(r_1)}, u_2^{(q_1)} \rangle \right.} \\
& \quad \left. + \langle \theta_D^{(r_D)}, \theta_D^{(q_D)} \rangle \dots \langle \theta_2^{(r_2)}, \theta_2^{(q_2)} \rangle \langle u_1^{(r_1)}, u_1^{(q_1)} \rangle + \langle \phi_D^{(r_D)}, \phi_D^{(q_D)} \rangle \dots \langle \phi_2^{(r_2)}, \phi_2^{(q_2)} \rangle \langle u_1^{(r_1)}, u_2^{(q_1)} \rangle \right)} \\
& = \sigma_{\min}(A) \min_{r_1} \sqrt{\sum_{r_2, \dots, r_D} G^2(r_1, \dots, r_D)}, \tag{60}
\end{aligned}$$

where the last inequality is from the conditions on  $\theta_d^{(r)}$  and  $\phi_d^{(r)}$ . We finish the proof by combining (58), (59), (60), and the fact that

$$\frac{\|\text{vec}(G)\|_1}{\min_{r_1} \sqrt{\sum_{r_2, \dots, r_D} G^2(r_1, \dots, r_D)}} \leq CR_1 \sqrt{\text{nnz}(G)},$$

where  $C = \max_{r_1} \sqrt{\sum_{r_2, \dots, r_D} G^2(r_1, \dots, r_D)} / \min_{r_1} \sqrt{\sum_{r_2, \dots, r_D} G^2(r_1, \dots, r_D)}$ .  $\square$
